# Supplementary material for: Iodine–PPh3-mediated C3-sulfenylation of indoles with sodium sulfinates
Source: Royal Society of Chemistry journal article supplement (doi:10.1039/c4ra02607a), 2014-01-01

## Electronic Supplementary Information

### Iodine-mediated 3-sulfenylation of indoles with sodium sulfinates

Praewpan Katrun,<sup>a</sup> Sakchai Hongthong,<sup>a</sup> Sornsiri Hlekhilai,<sup>a</sup> Manat Pohmakotr,<sup>a</sup>  
Vichai Reutrakul,<sup>a</sup> Darunee Soorukram,<sup>a</sup> Thaworn Jaipetch<sup>b</sup> and Chutima Kuhakarn<sup>\*a</sup>

<sup>a</sup>*Department of Chemistry and Center of Excellence for Innovation in Chemistry (PERCH-CIC),  
Faculty of Science, Mahidol University, Rama VI Road, Bangkok 10400, Thailand*

<sup>b</sup>*Mahidol University, Kanchanaburi Campus, Saiyok, Kanchanaburi 71150, Thailand*

E-mail: chutima.kon@mahidol.ac.th

#### Contents

|                                                                                                  |        |
|--------------------------------------------------------------------------------------------------|--------|
| General information                                                                              | S2     |
| General procedure for the 3-sulfenylation of indoles                                             | S2     |
| <sup>1</sup> H and <sup>13</sup> C NMR spectra of <b>3-5</b> , <b>7</b> , <b>9</b> and <b>10</b> | S3-S22 |

### **General information**

<sup>1</sup>H NMR spectra were recorded with a Bruker Ascend™ 400 (400 MHz) and Bruker Avance-500 (500 MHz) spectrometer in CDCl<sub>3</sub> by using tetramethylsilane ( $\delta = 0$  ppm) as an internal standard. <sup>13</sup>C NMR spectra were recorded with a Bruker Ascend™ 400 (400 MHz) and Bruker Avance-500 (500 MHz) spectrometer. Infrared spectra were recorded with a Perkin–Elmer 683 GX FTIR System spectrometer. High-resolution mass spectra (HRMS) were recorded with a Bruker micro TOF spectrometer in the ESI mode. Melting points were recorded with a digital Electrothermal Melting 9100 apparatus and were uncorrected. All reagents and solvents were obtained from commercial sources and used without further purification. Column chromatography was performed by using Merck silica gel 60 PF<sub>254</sub> (Art 7734).

### **General procedure for the 3-sulfenylation of indoles**

Iodine (127.0 mg, 0.50 mmol) was added to a solution of indole (0.5 mmol), sodium arenesulfinate (0.75 mmol) and triphenylphosphine (0.75 mmol) in EtOH (2 mL; 0.25 M), and the reaction mixture was stirred at refluxing temperature for 2-8 h. The reaction mixture was quenched by the addition of sat. aq Na<sub>2</sub>S<sub>2</sub>O<sub>3</sub> (5 mL). Further stirring was followed by extraction with EtOAc (2 × 20 mL). The combined organic extracts were washed with H<sub>2</sub>O (20 mL) and brine (20 mL), dried (MgSO<sub>4</sub>), filtered, and concentrated (aspirator). The residue was purified by column chromatography using acetone/hexanes as eluent to afford the corresponding product.

# <sup>1</sup>H and <sup>13</sup>C NMR spectra

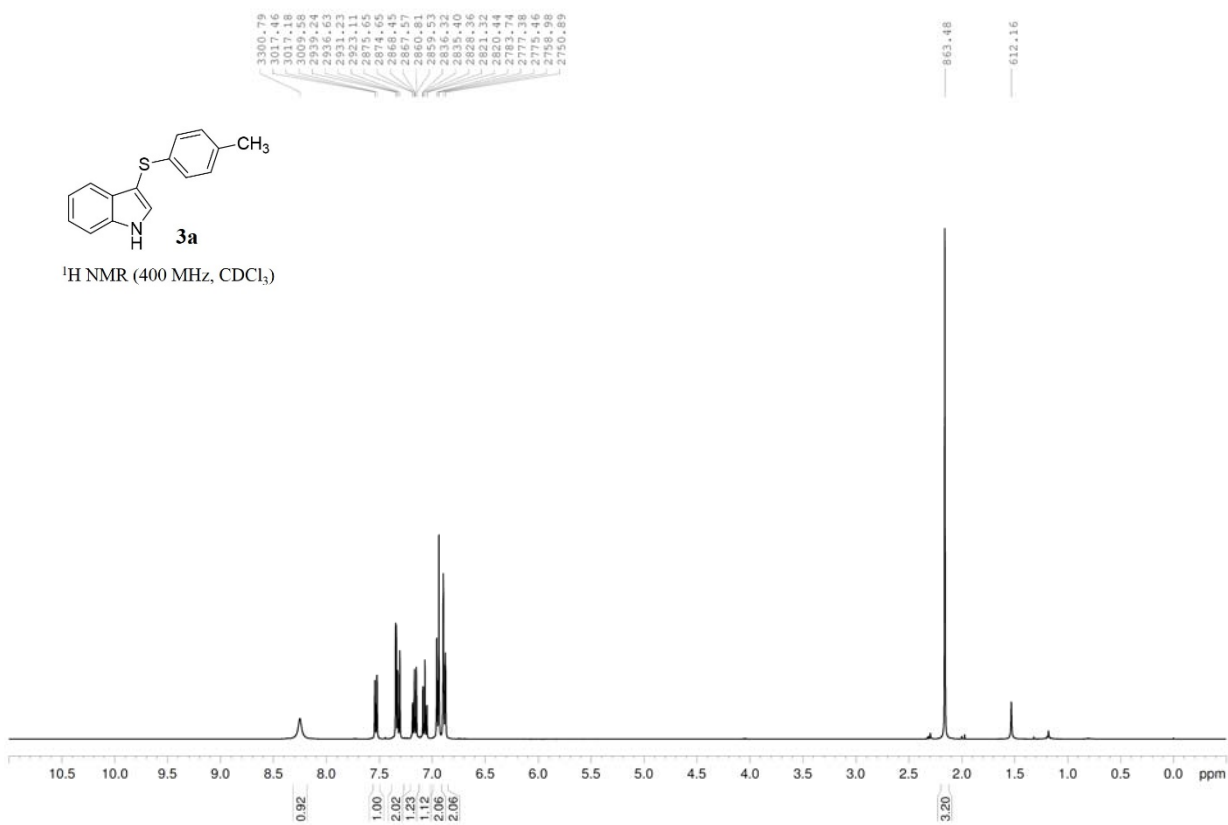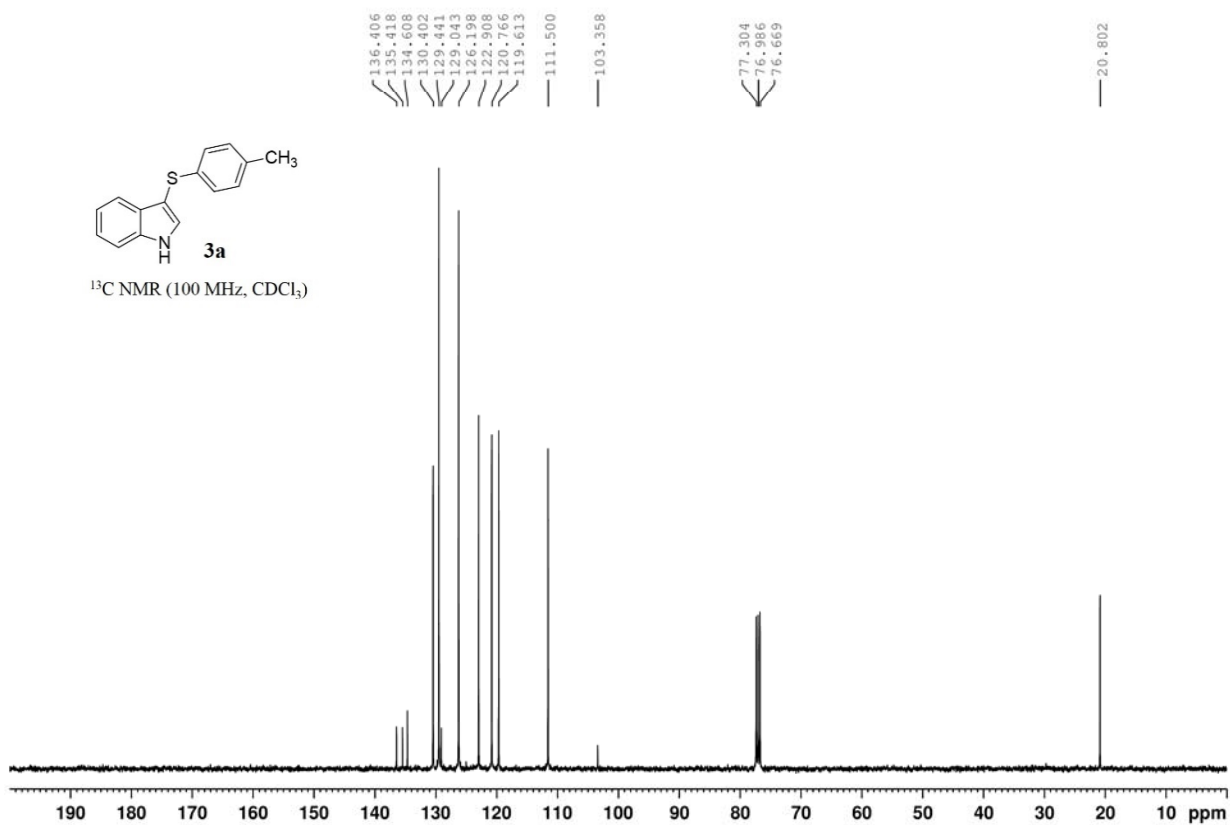

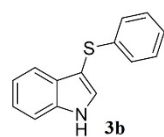

<sup>1</sup>H NMR (400 MHz, CDCl<sub>3</sub>)

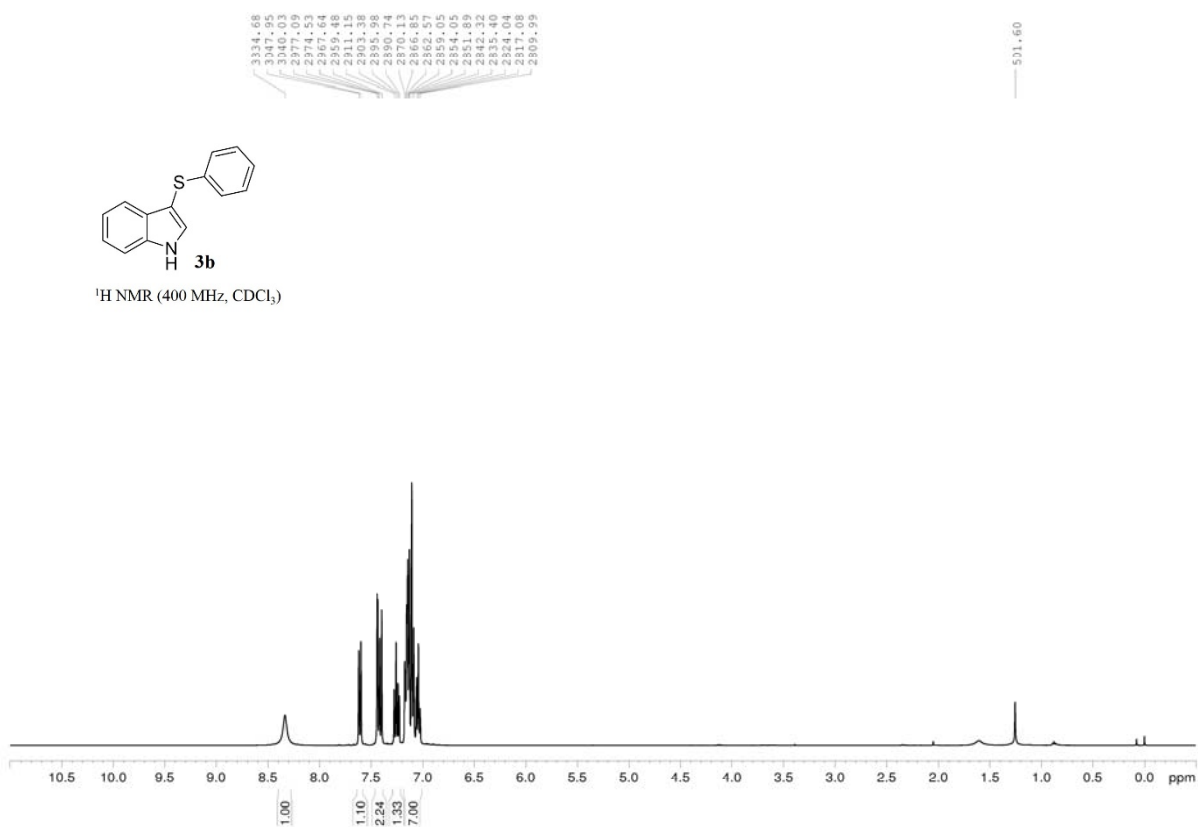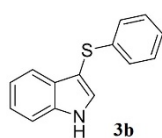

<sup>13</sup>C NMR (100 MHz, CDCl<sub>3</sub>)

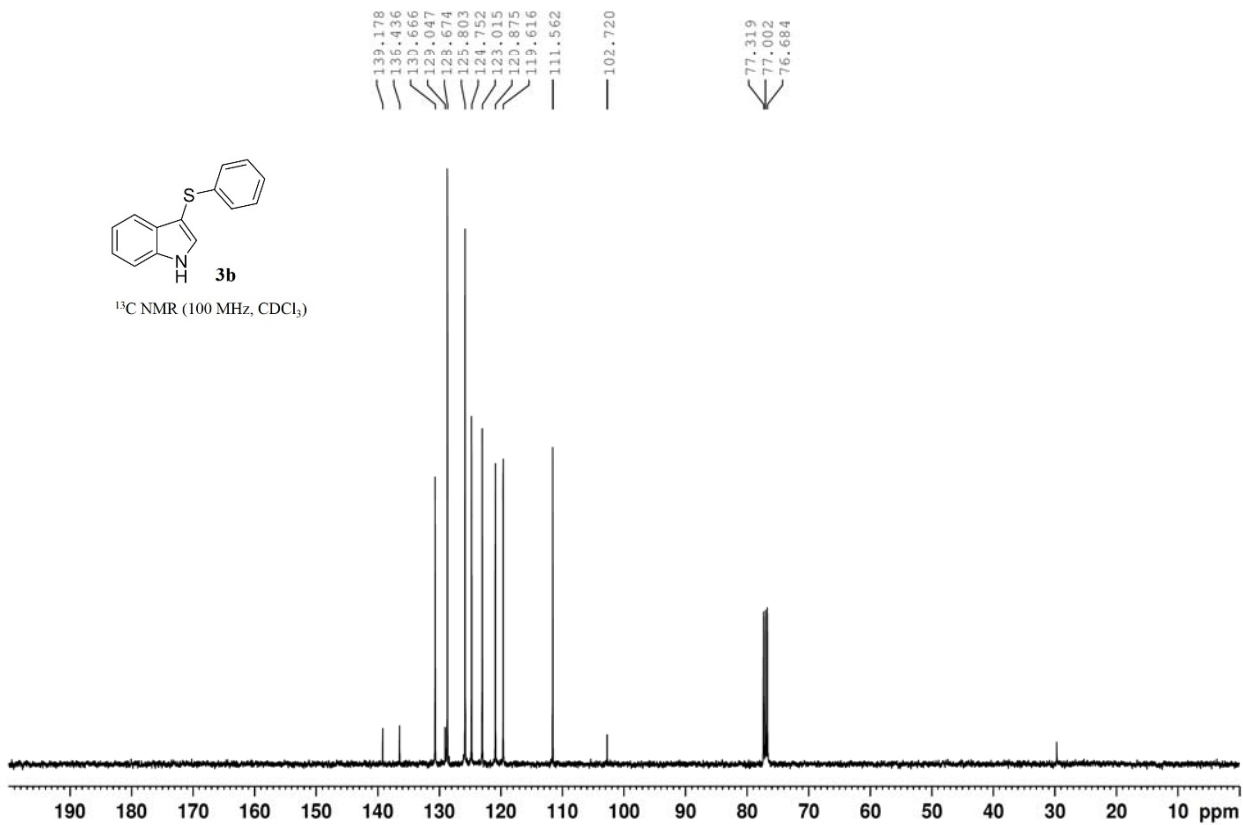

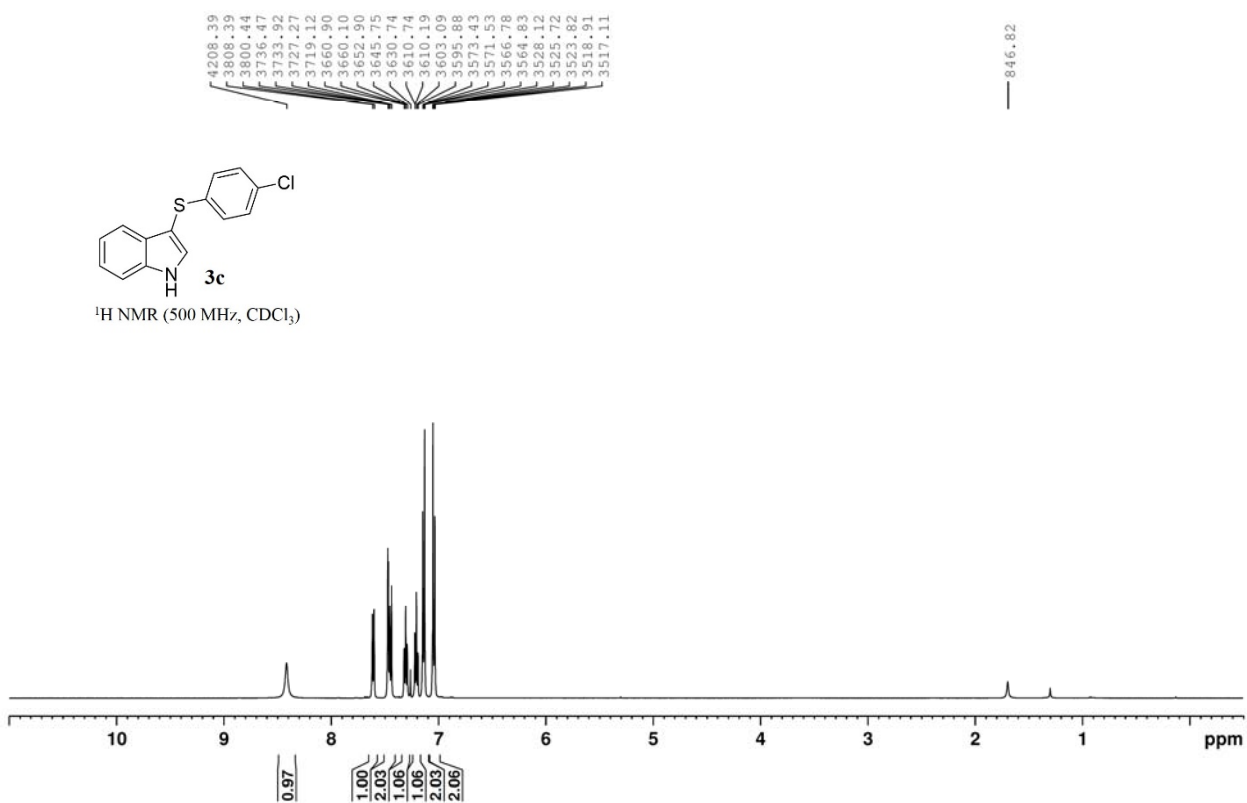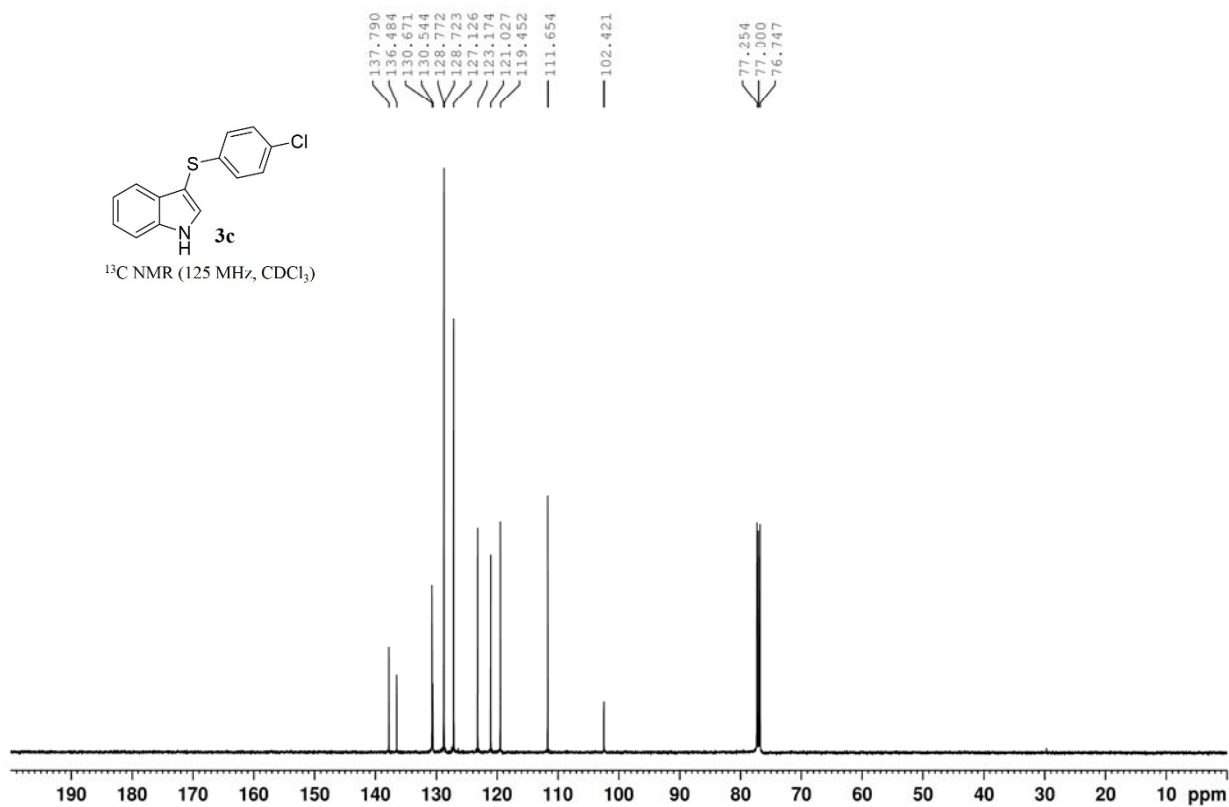

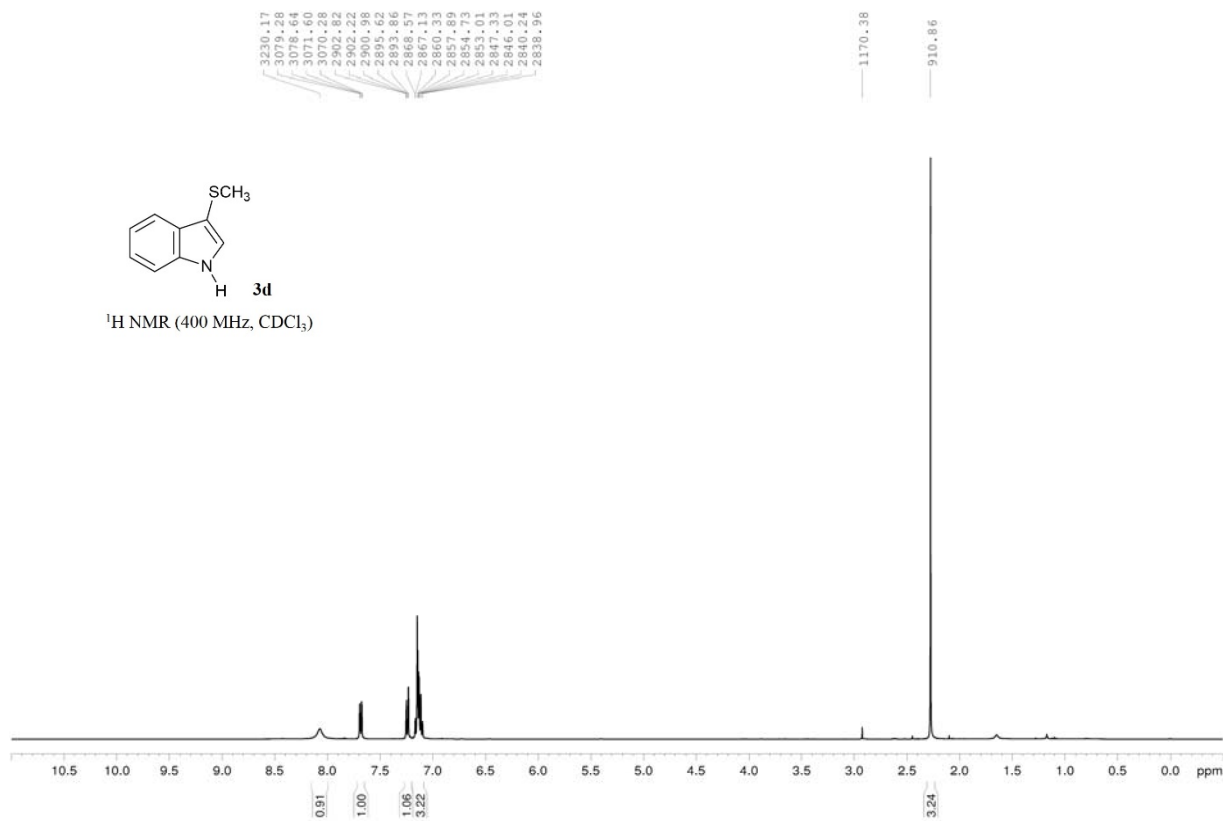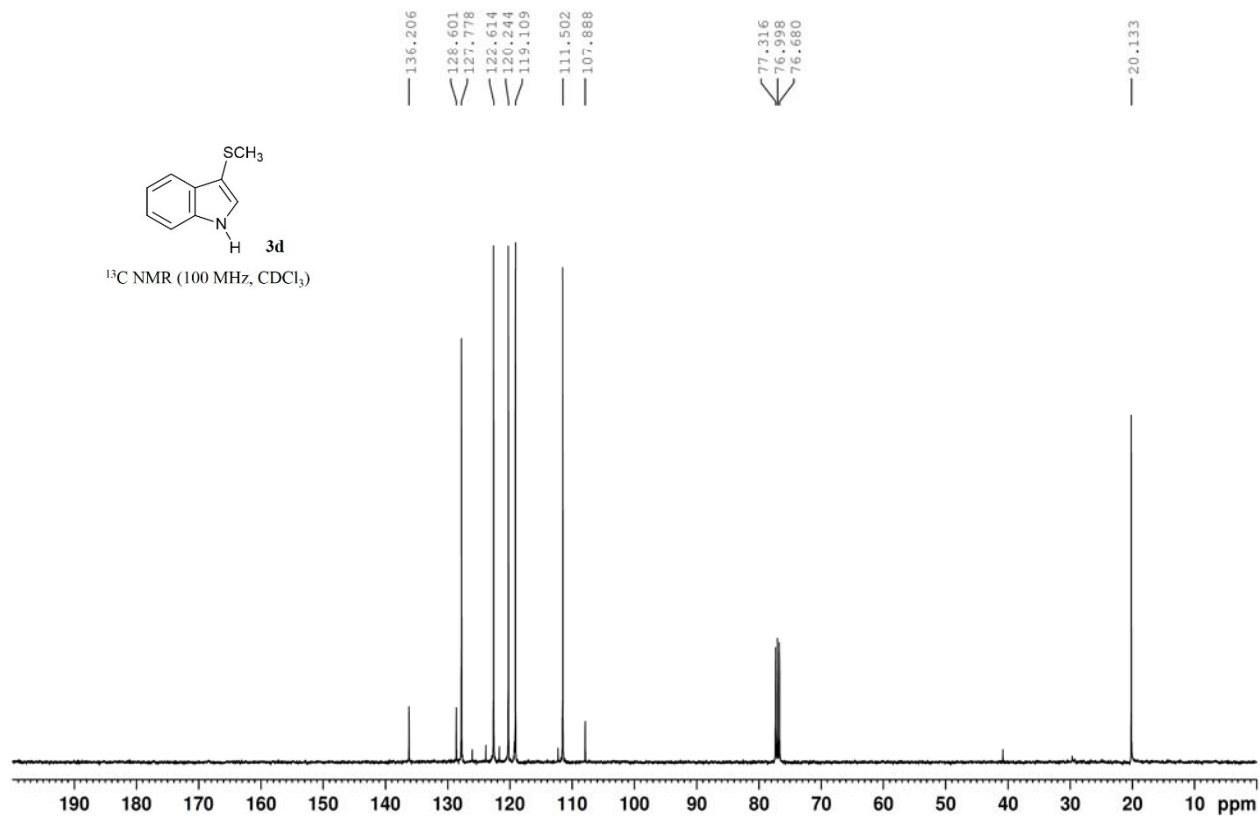

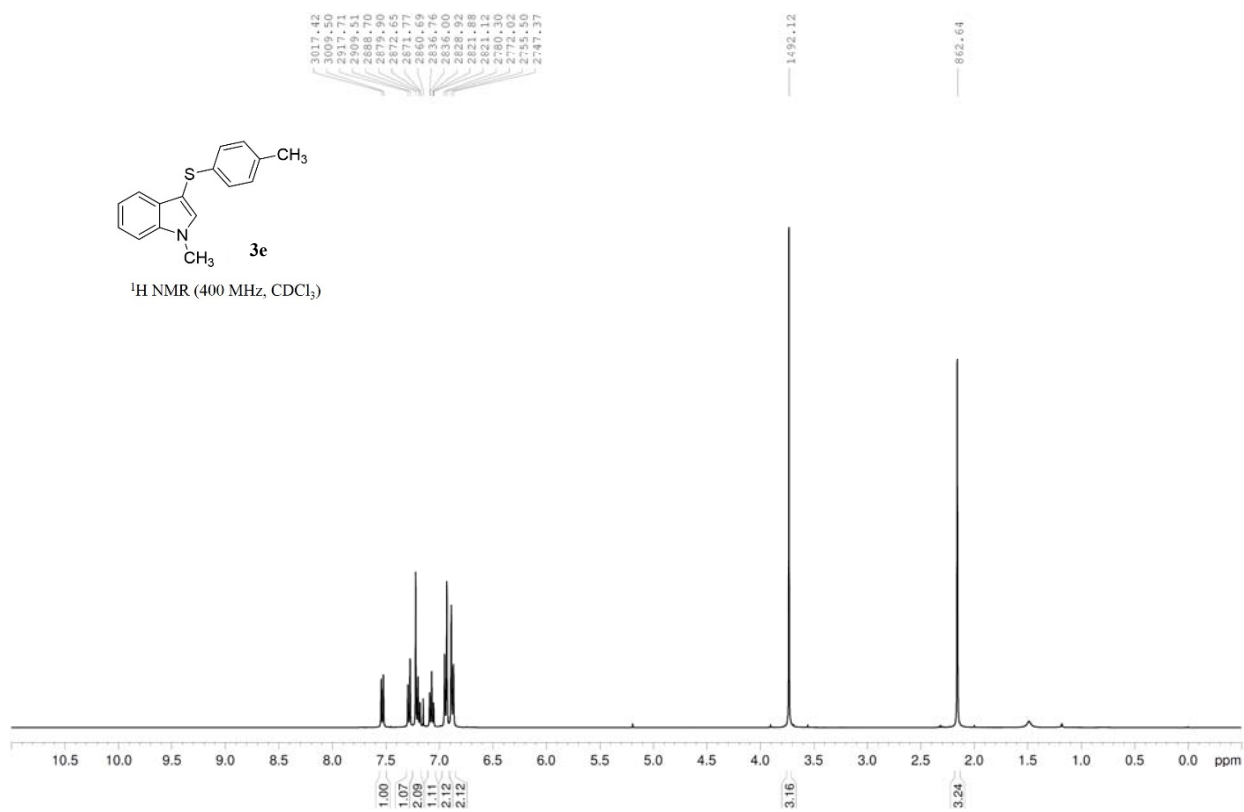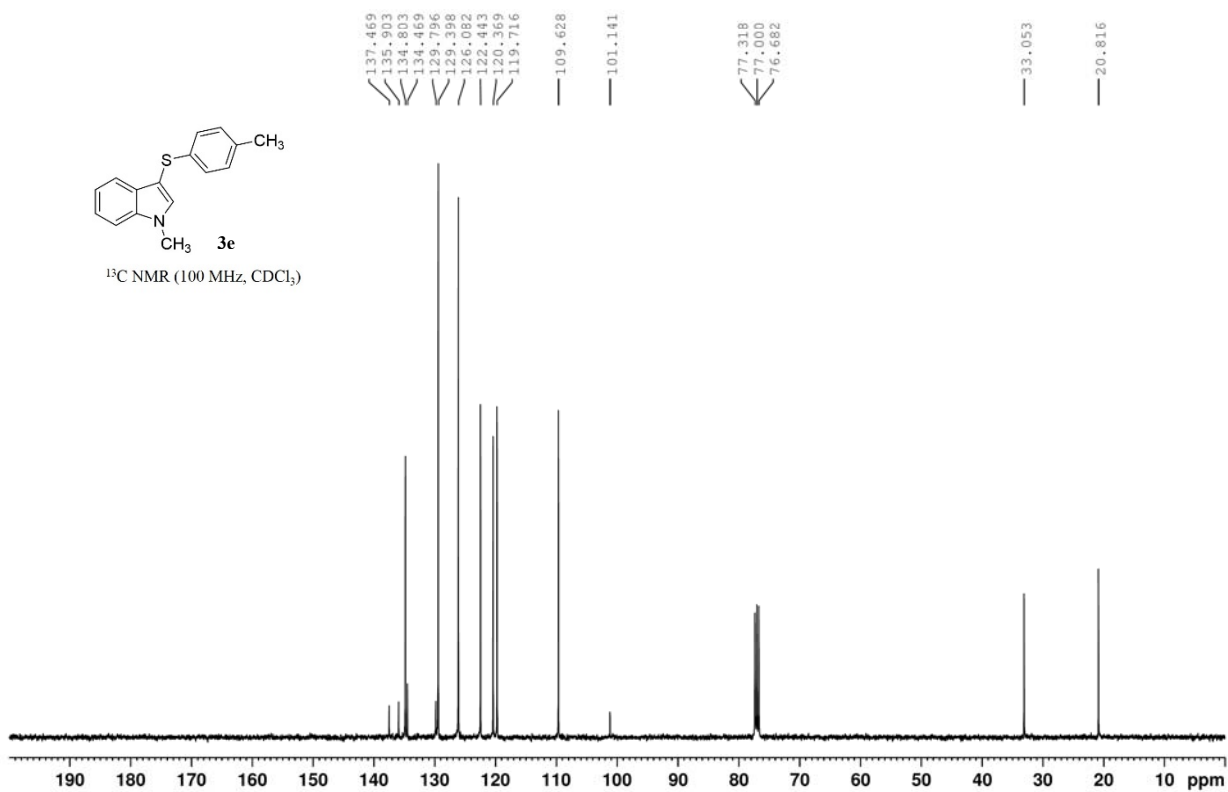

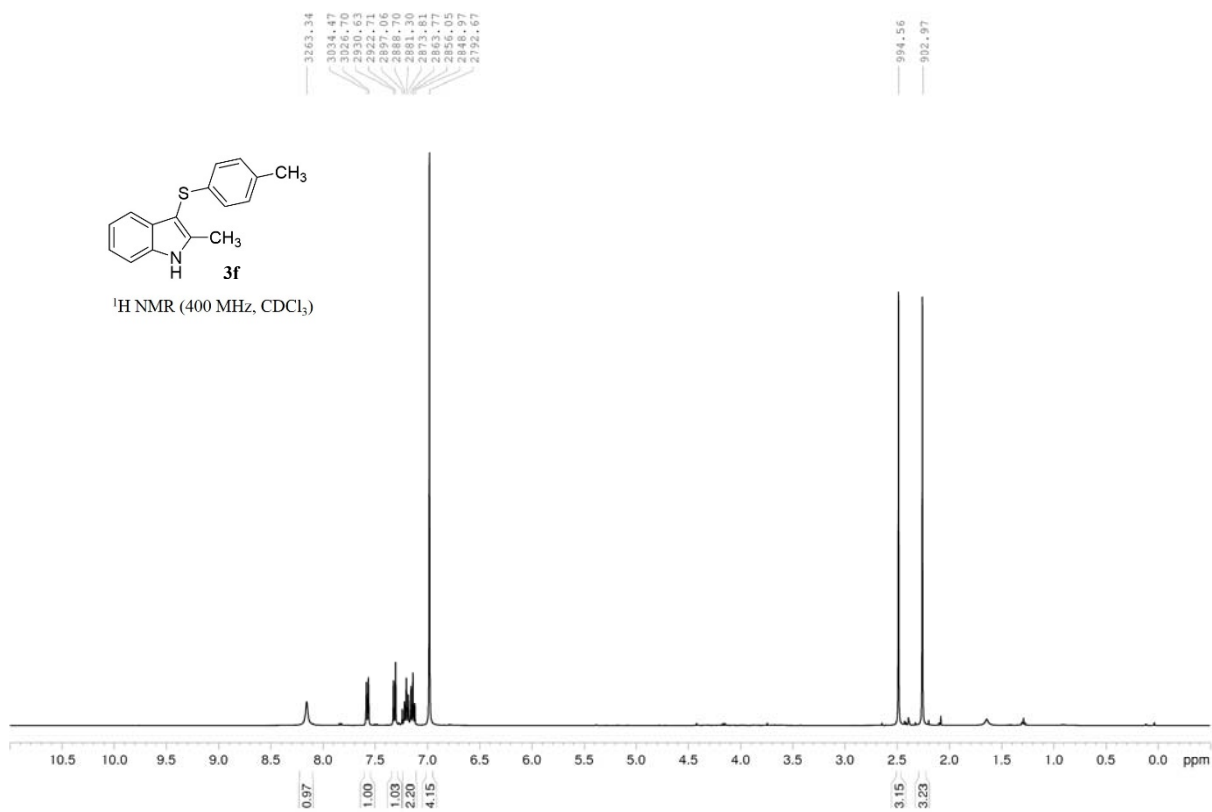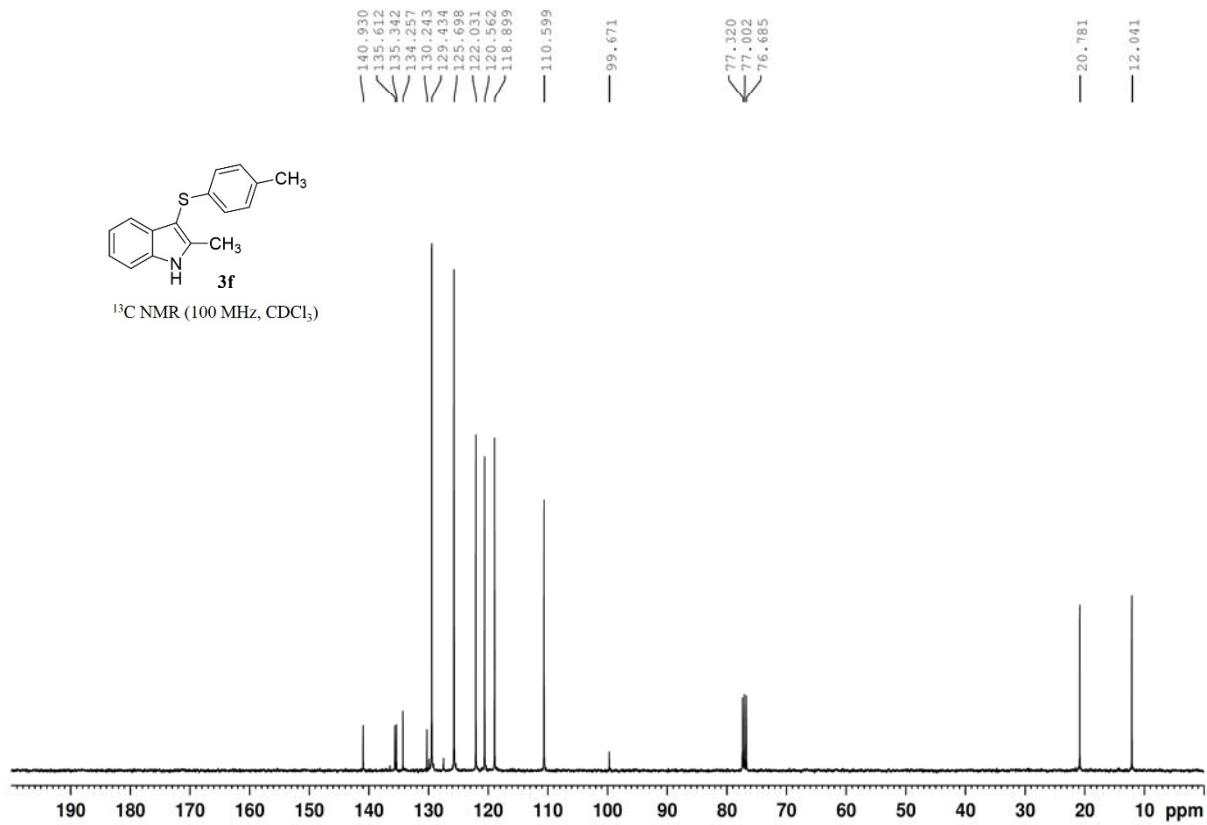



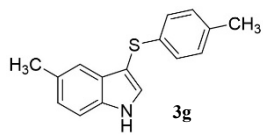

<sup>1</sup>H NMR (400 MHz, CDCl<sub>3</sub>)

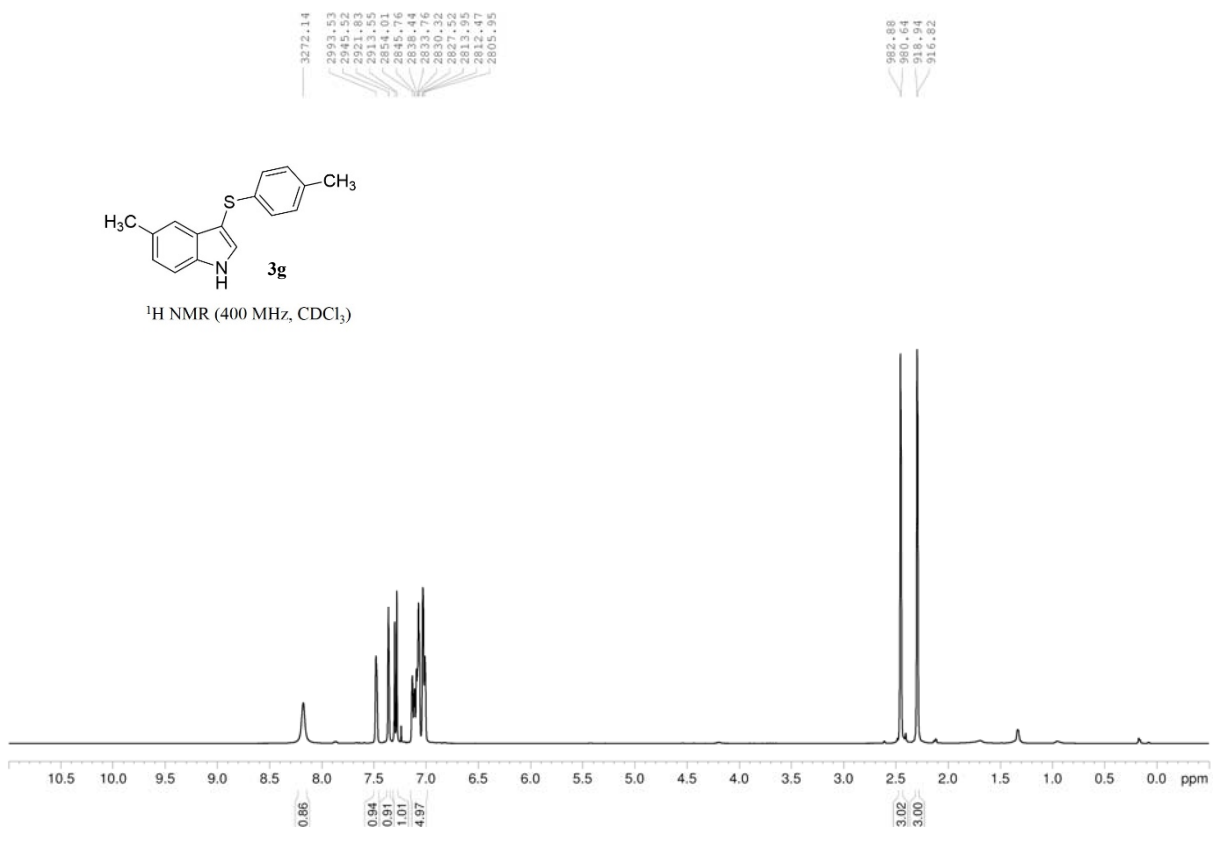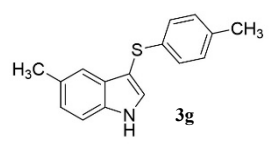

<sup>13</sup>C NMR (100 MHz, CDCl<sub>3</sub>)

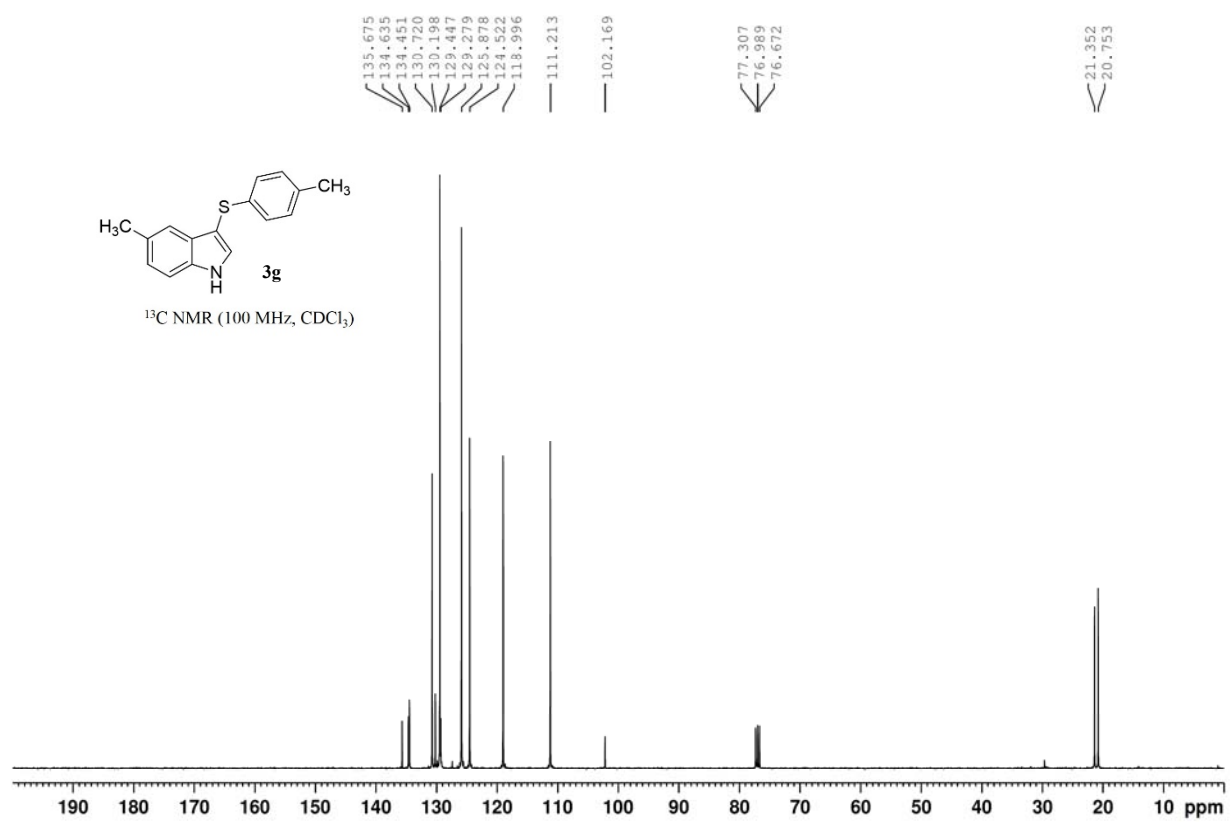

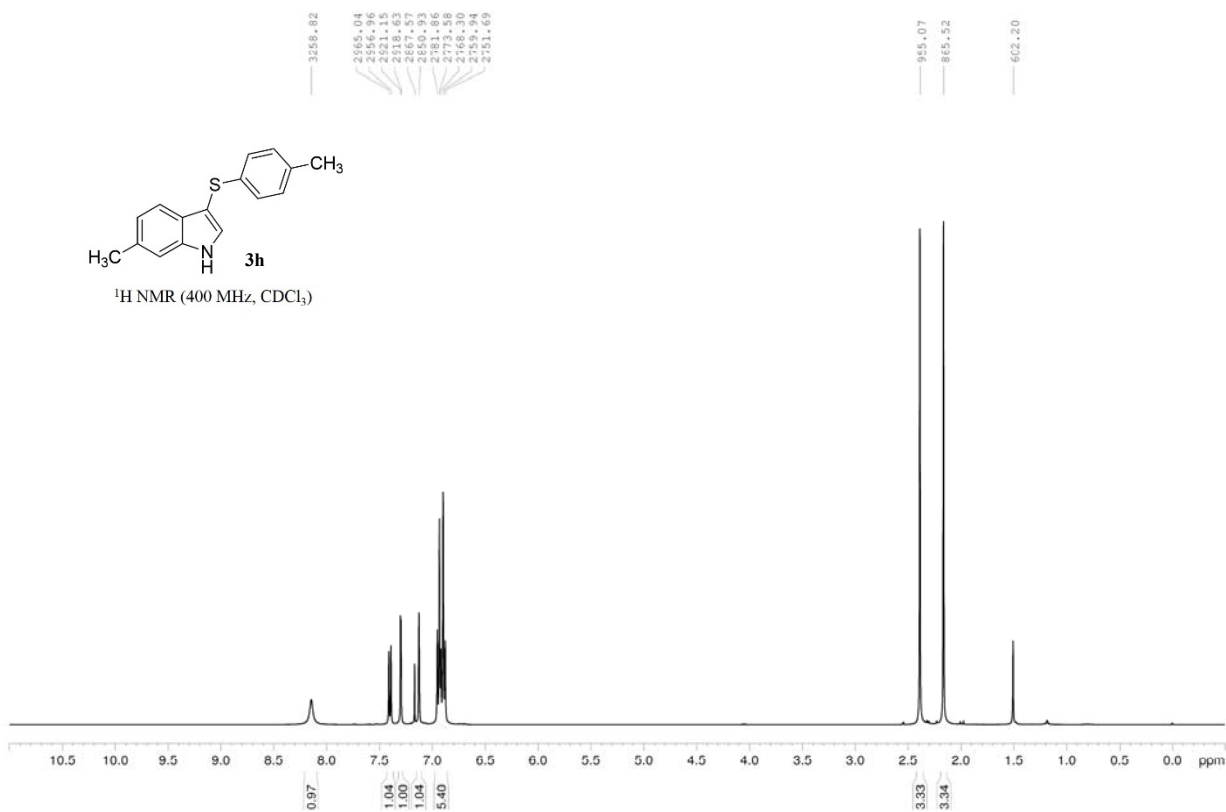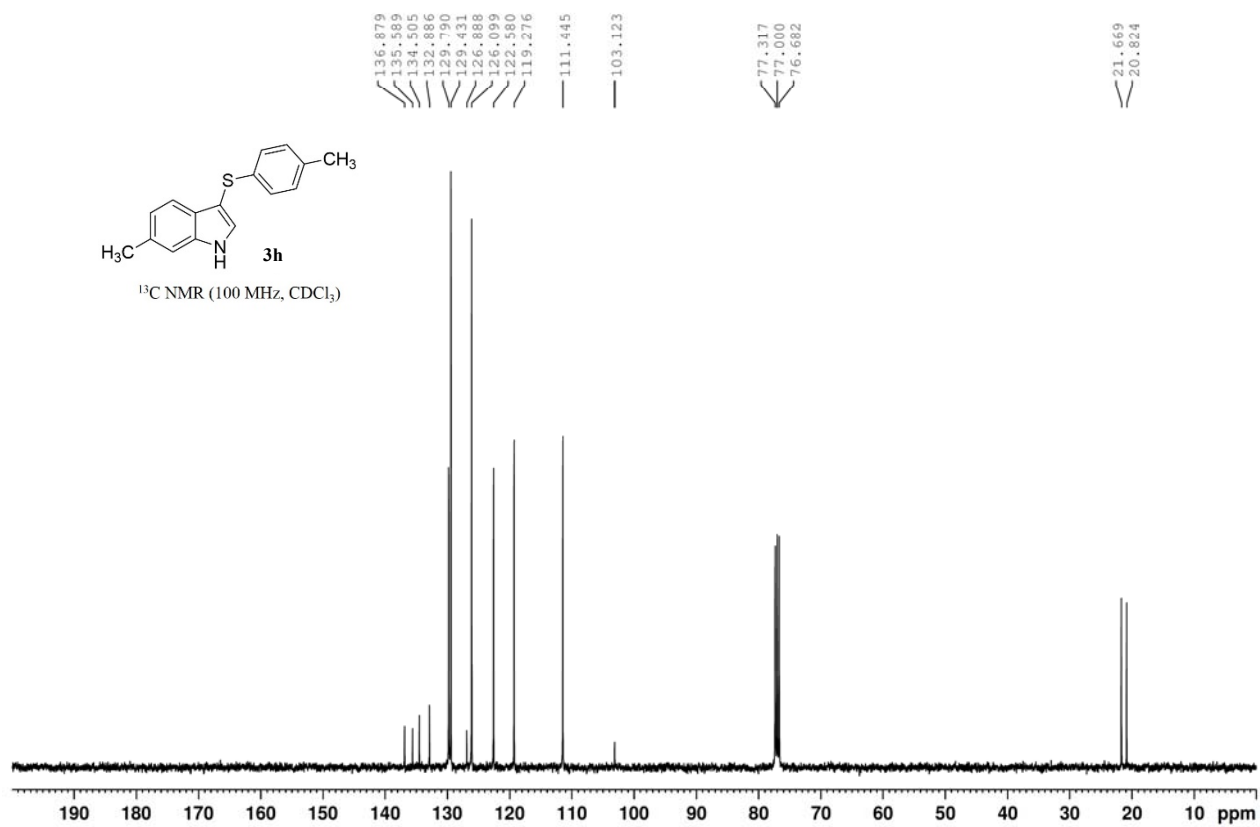

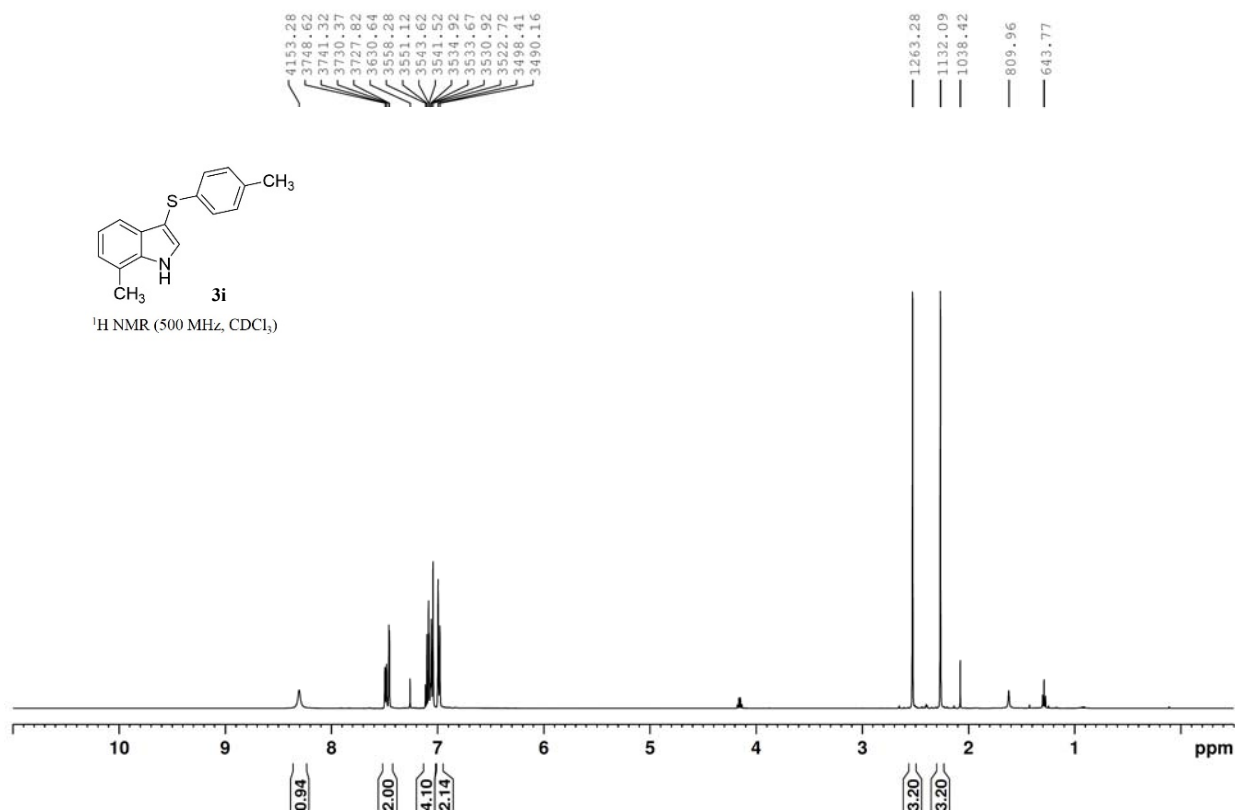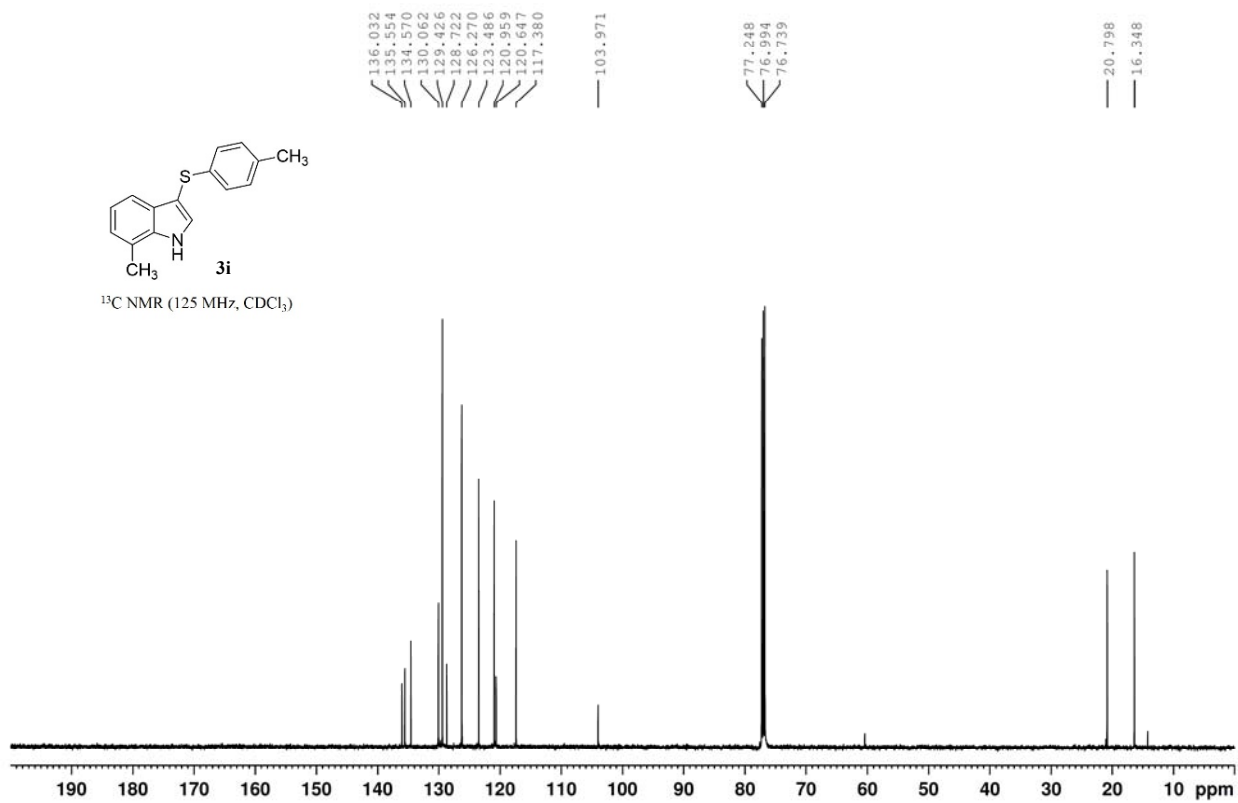



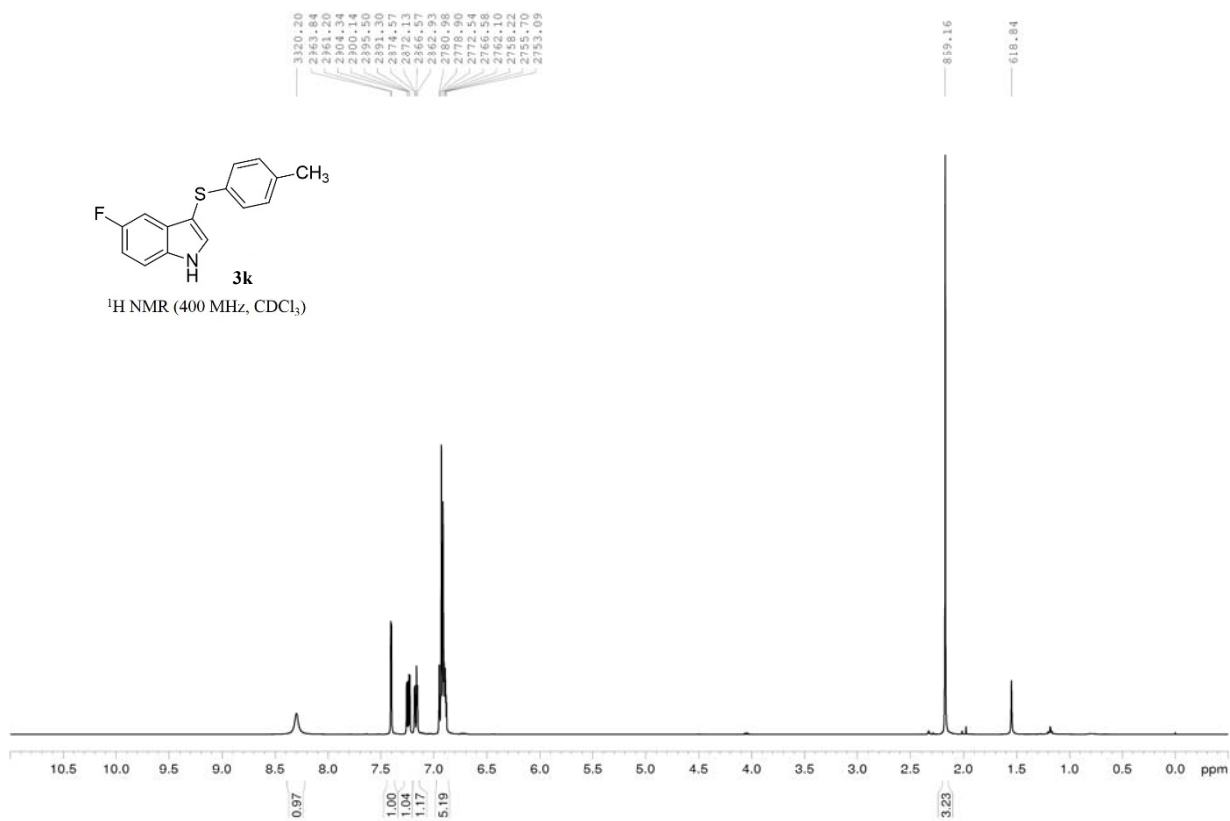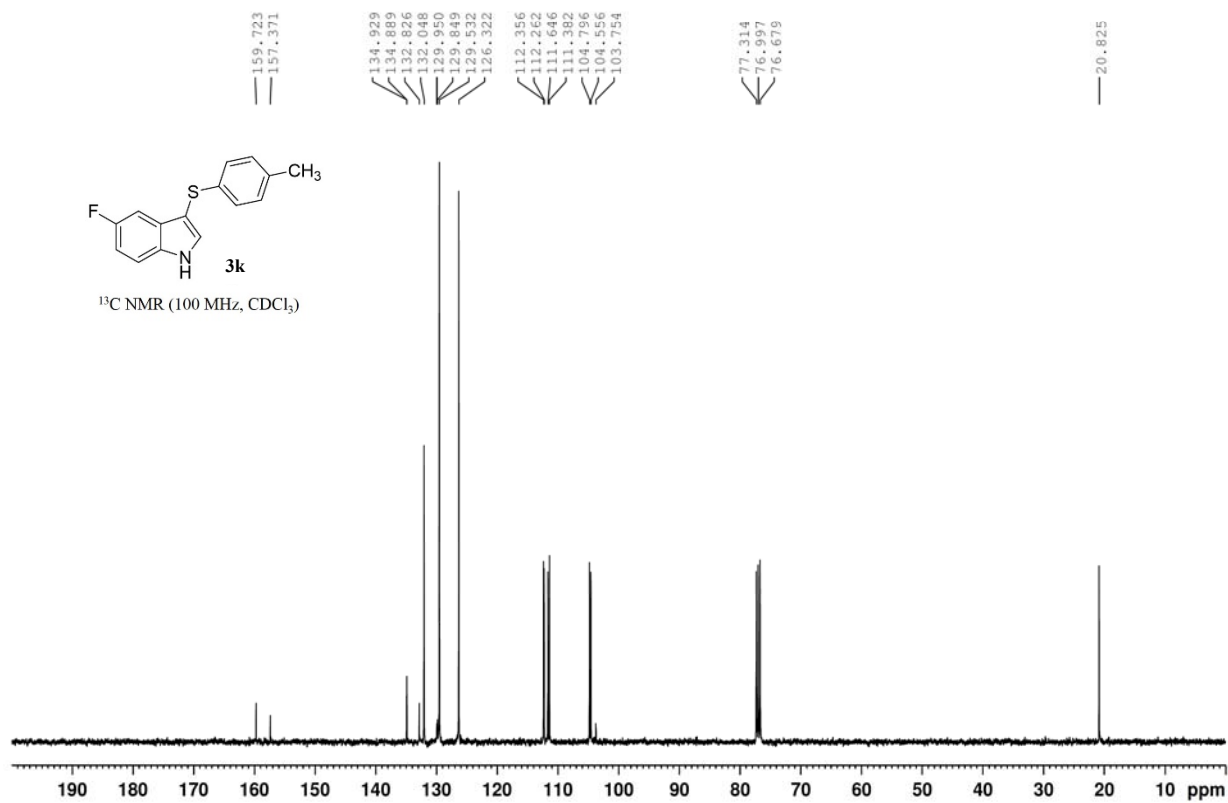

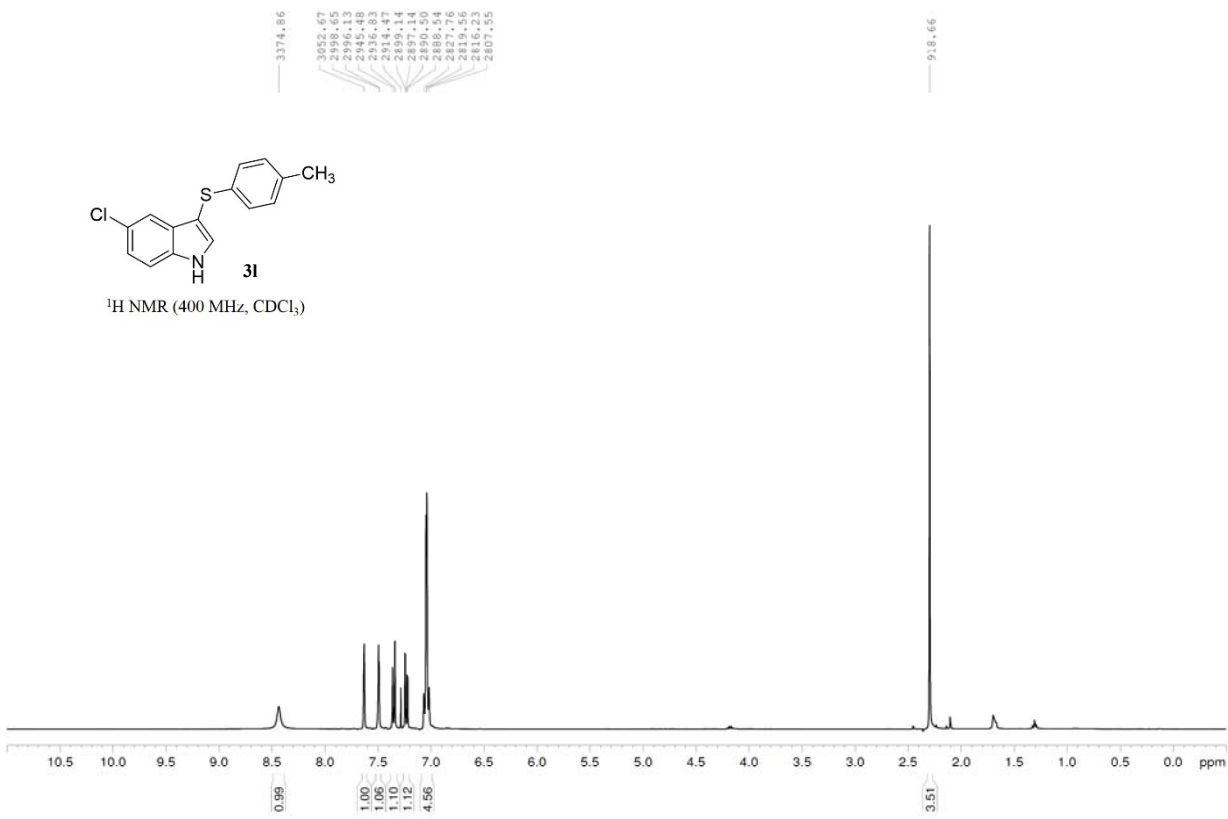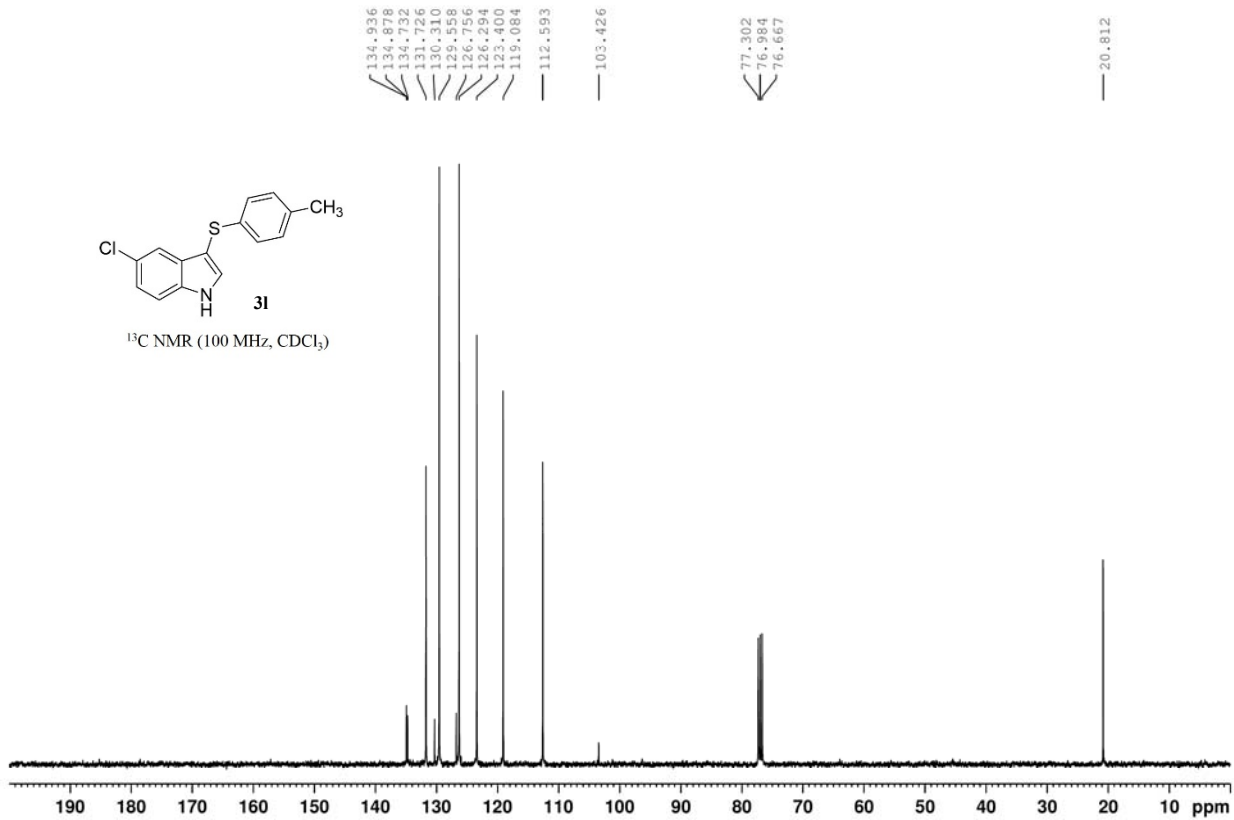

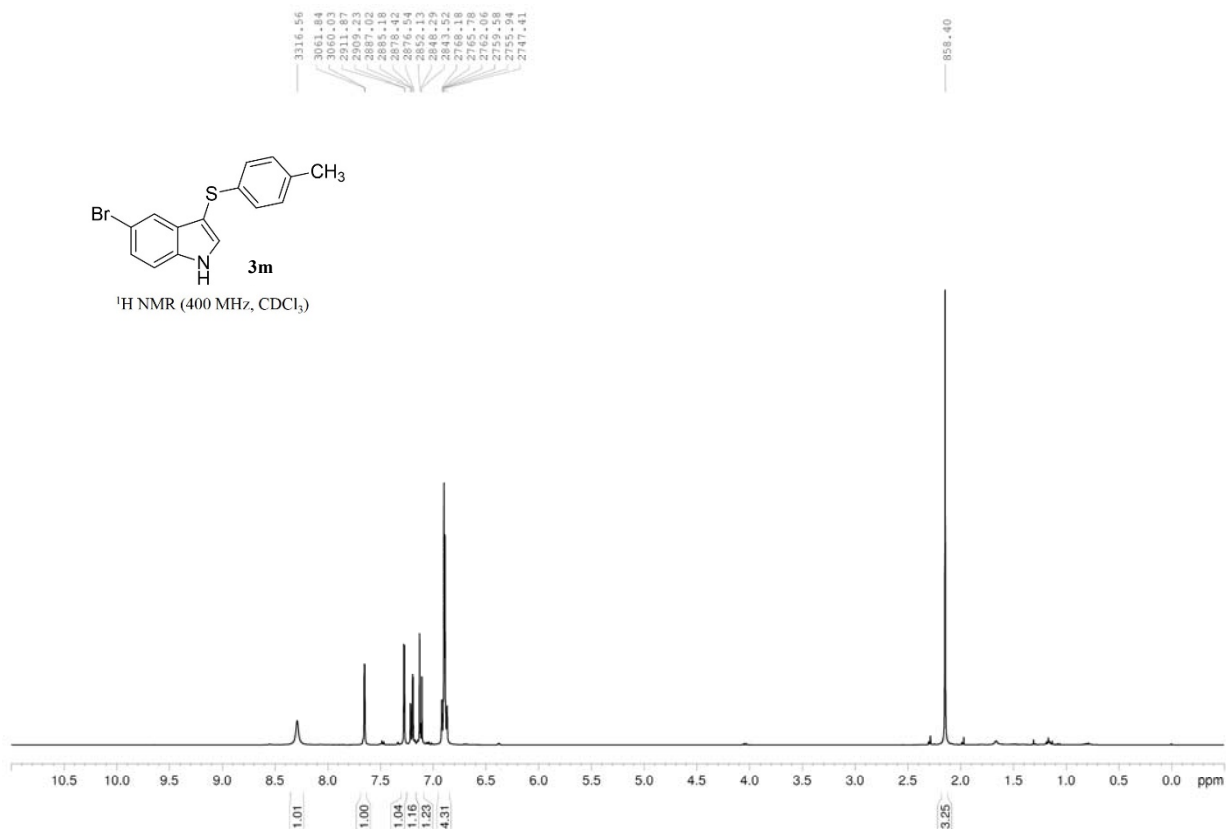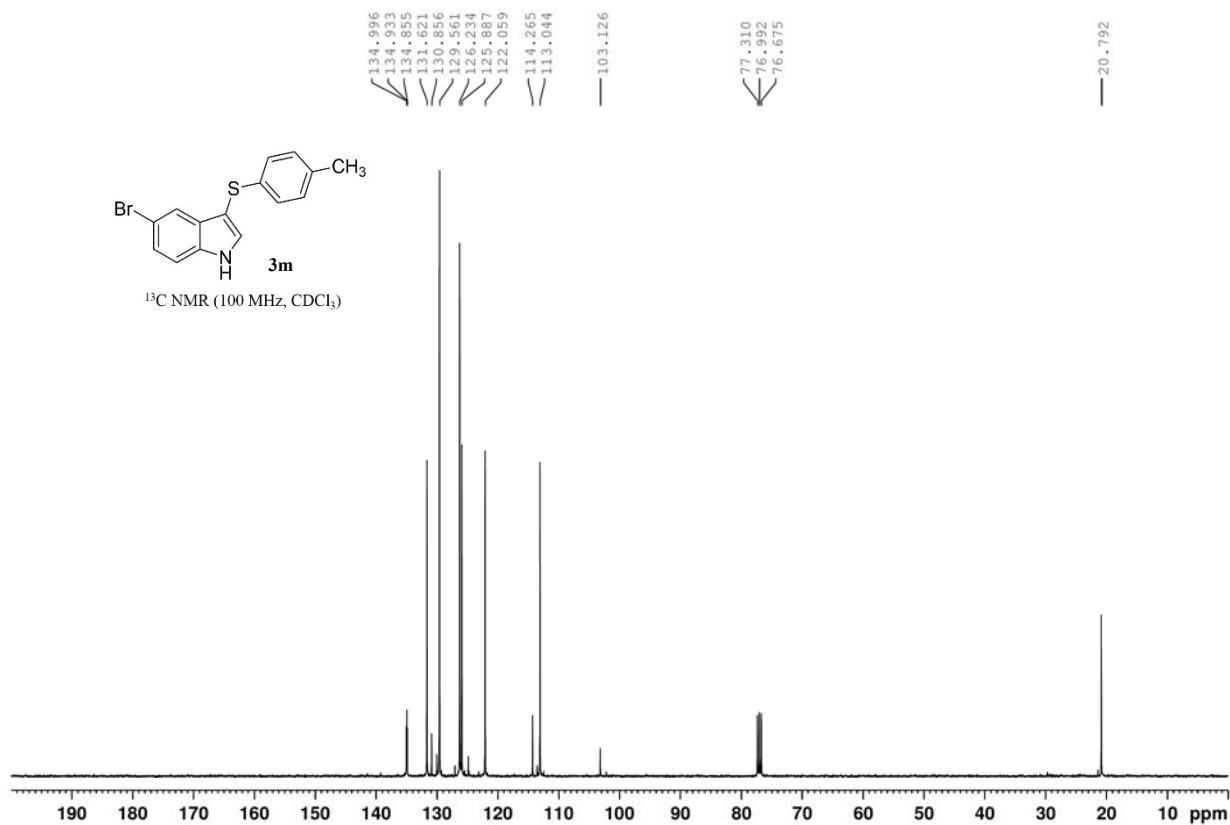

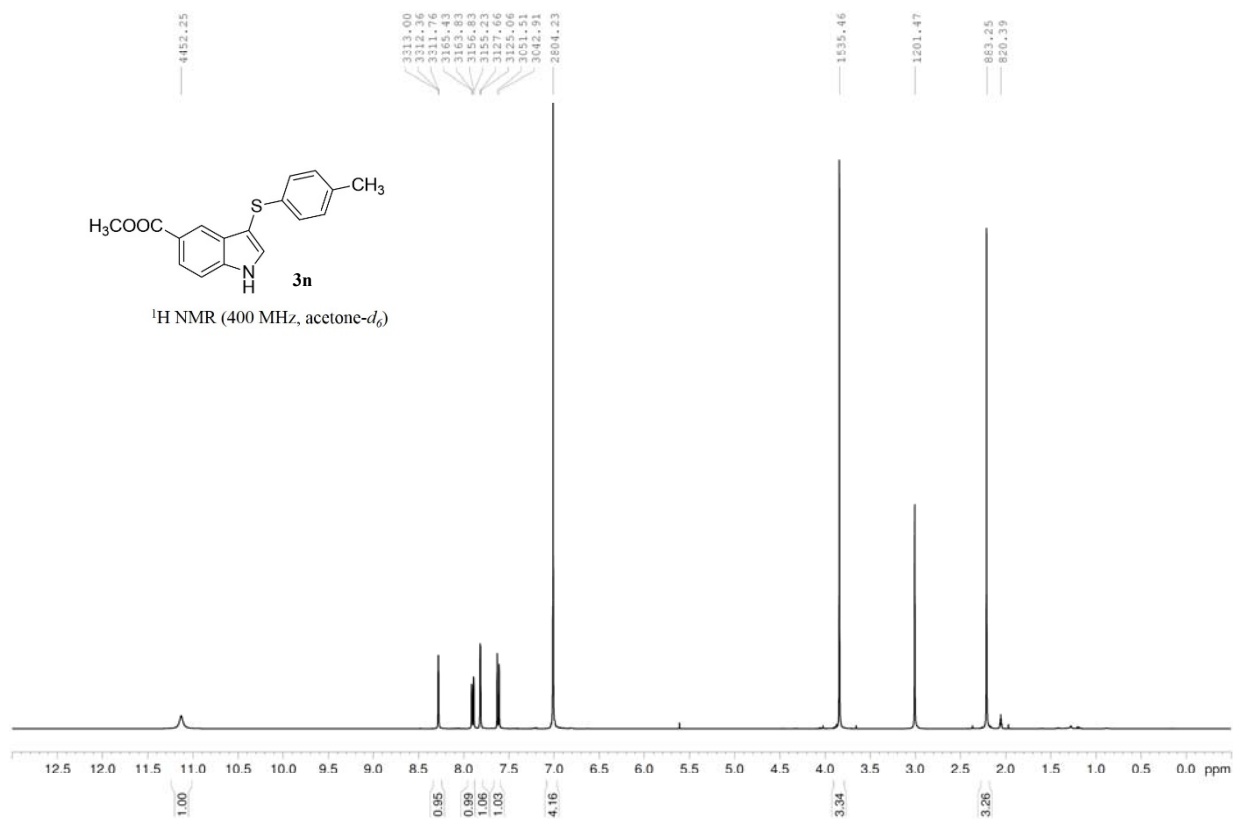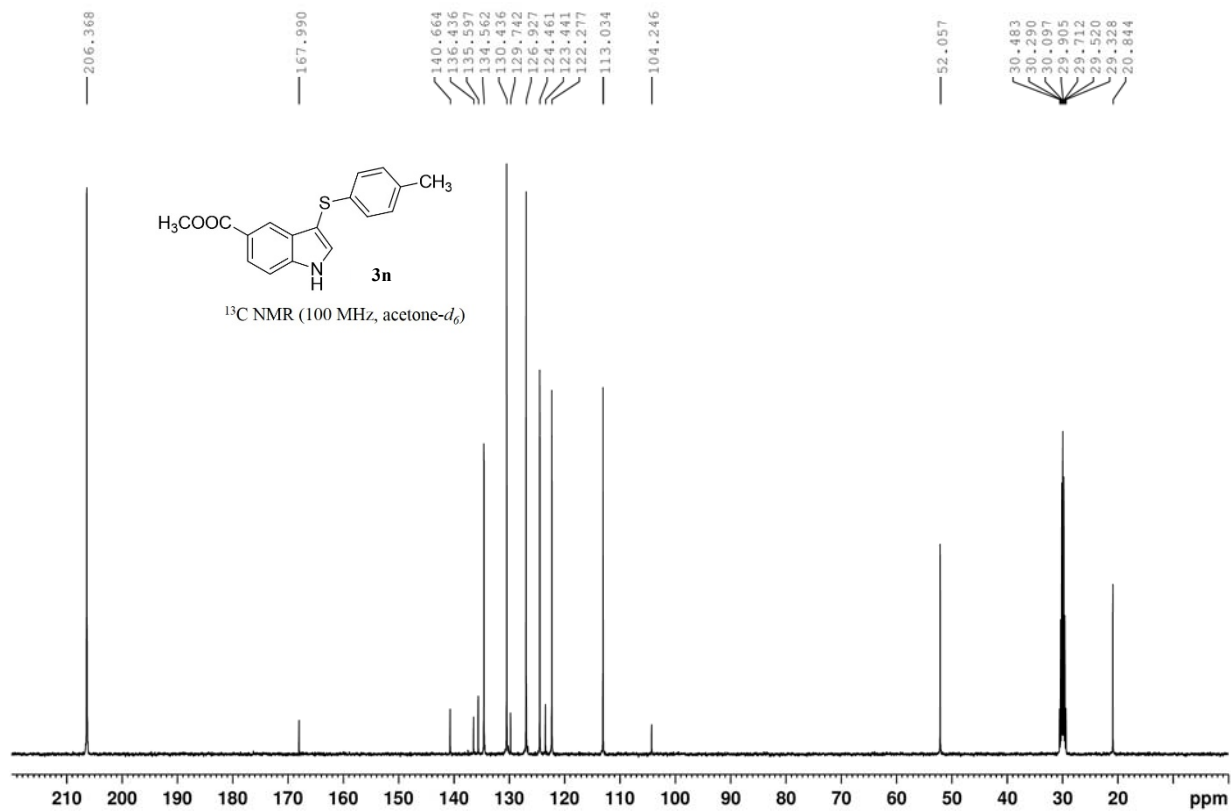



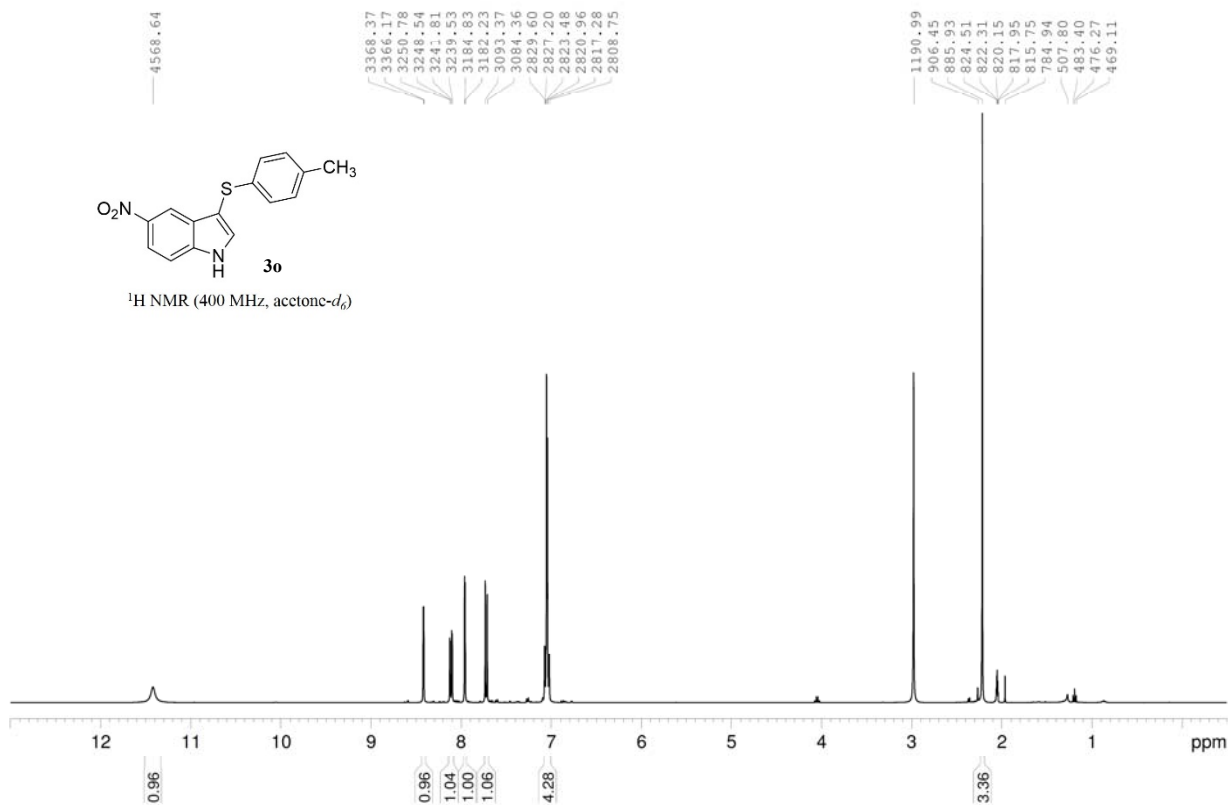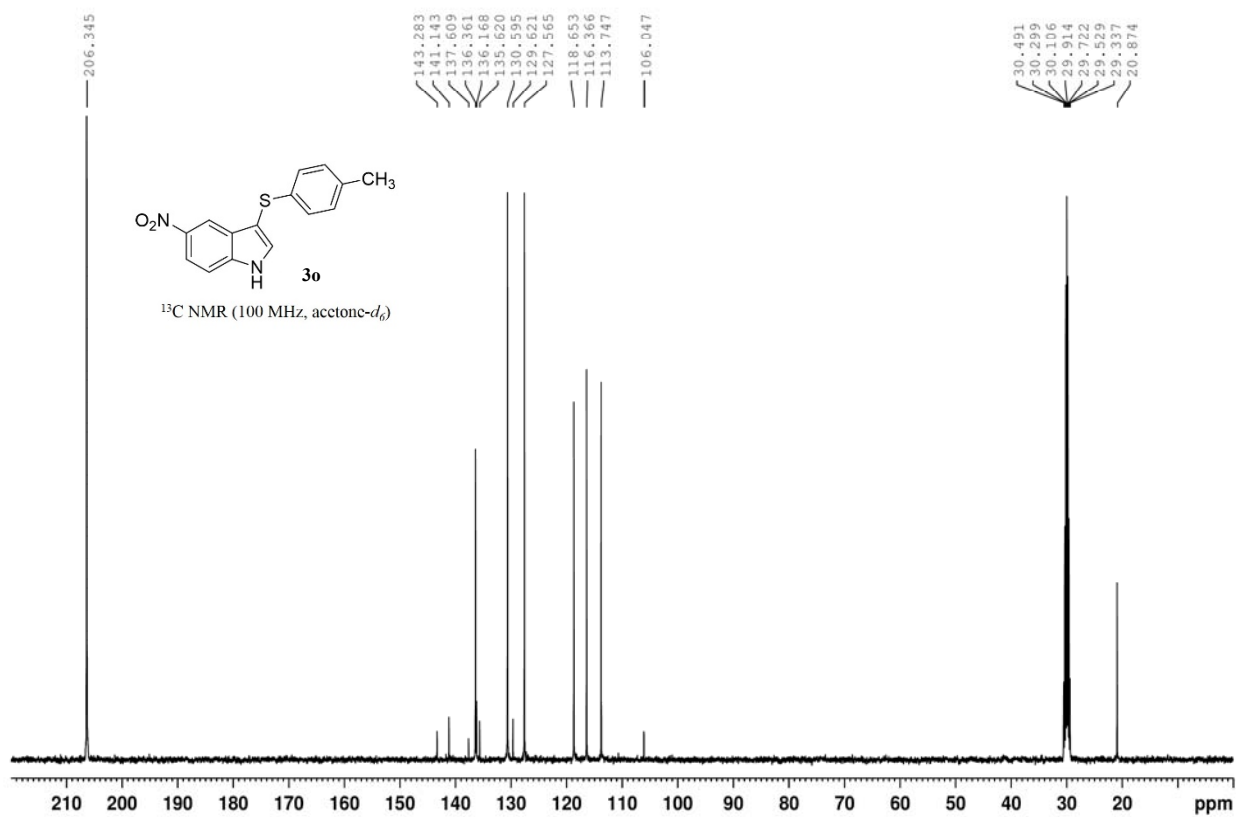

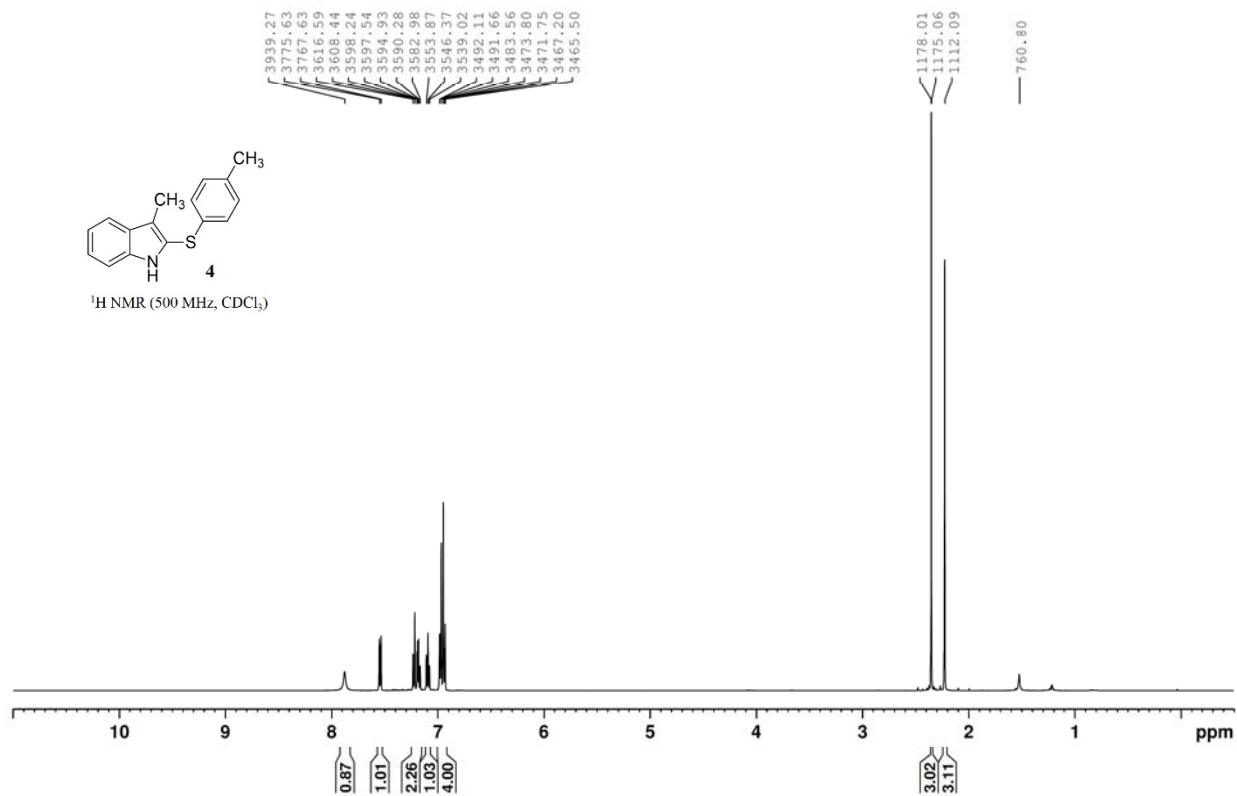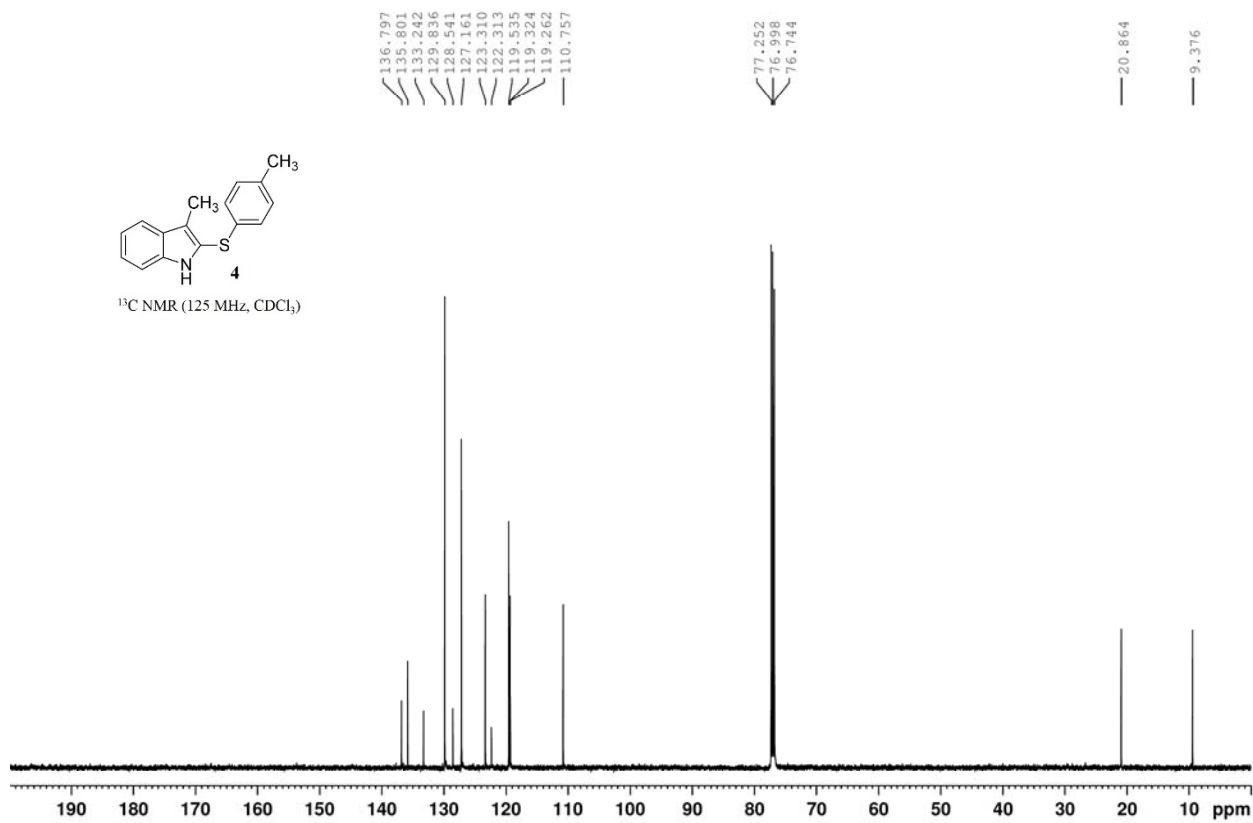

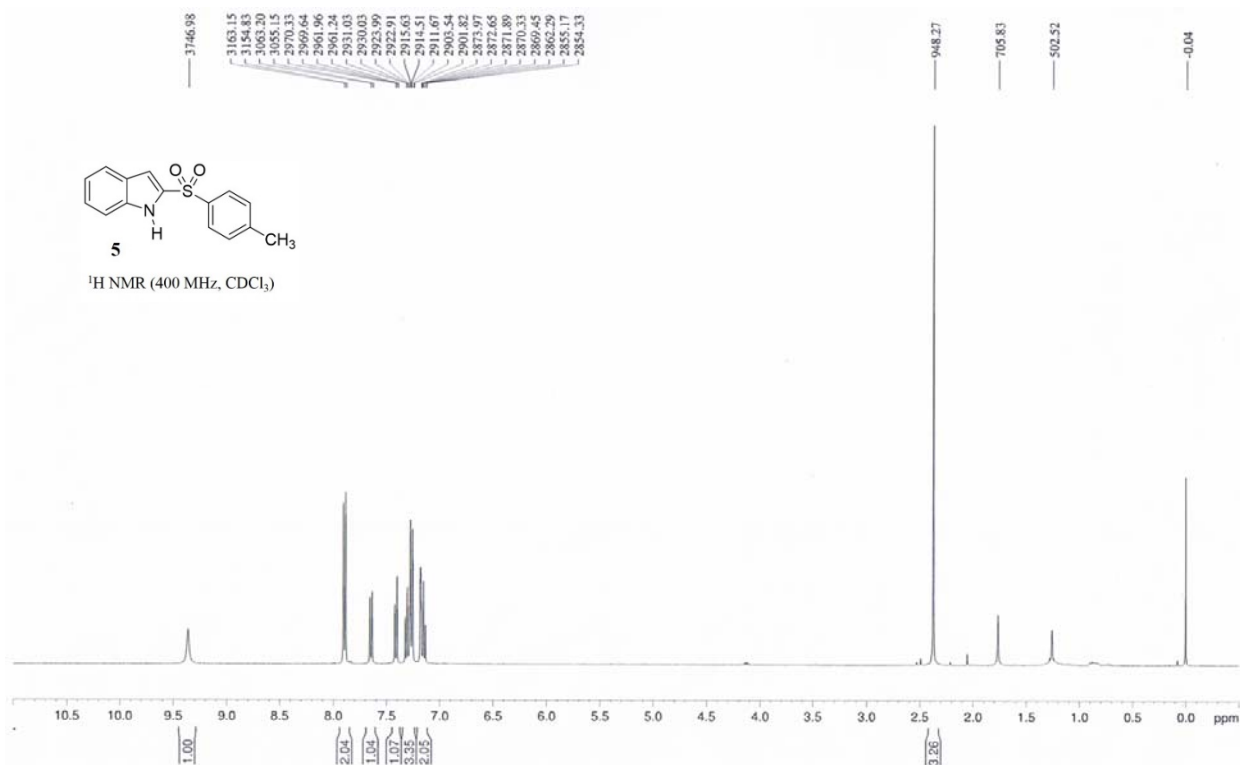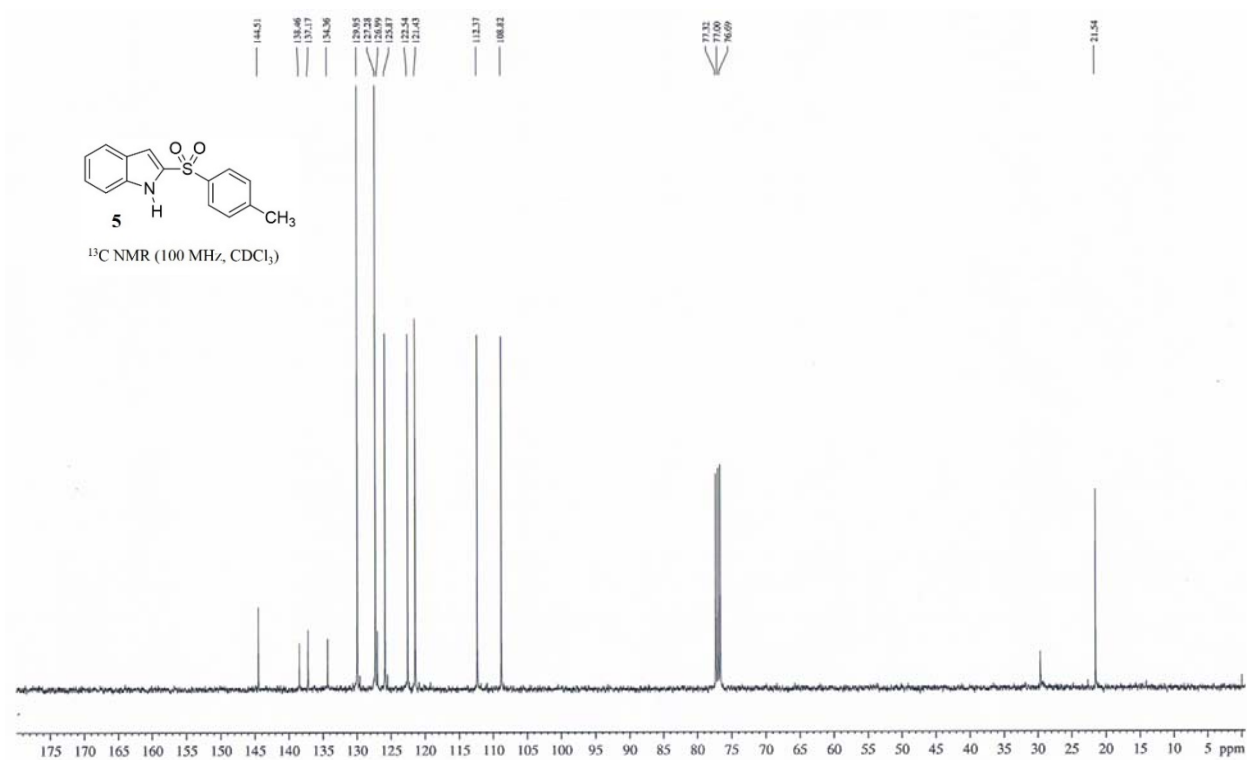

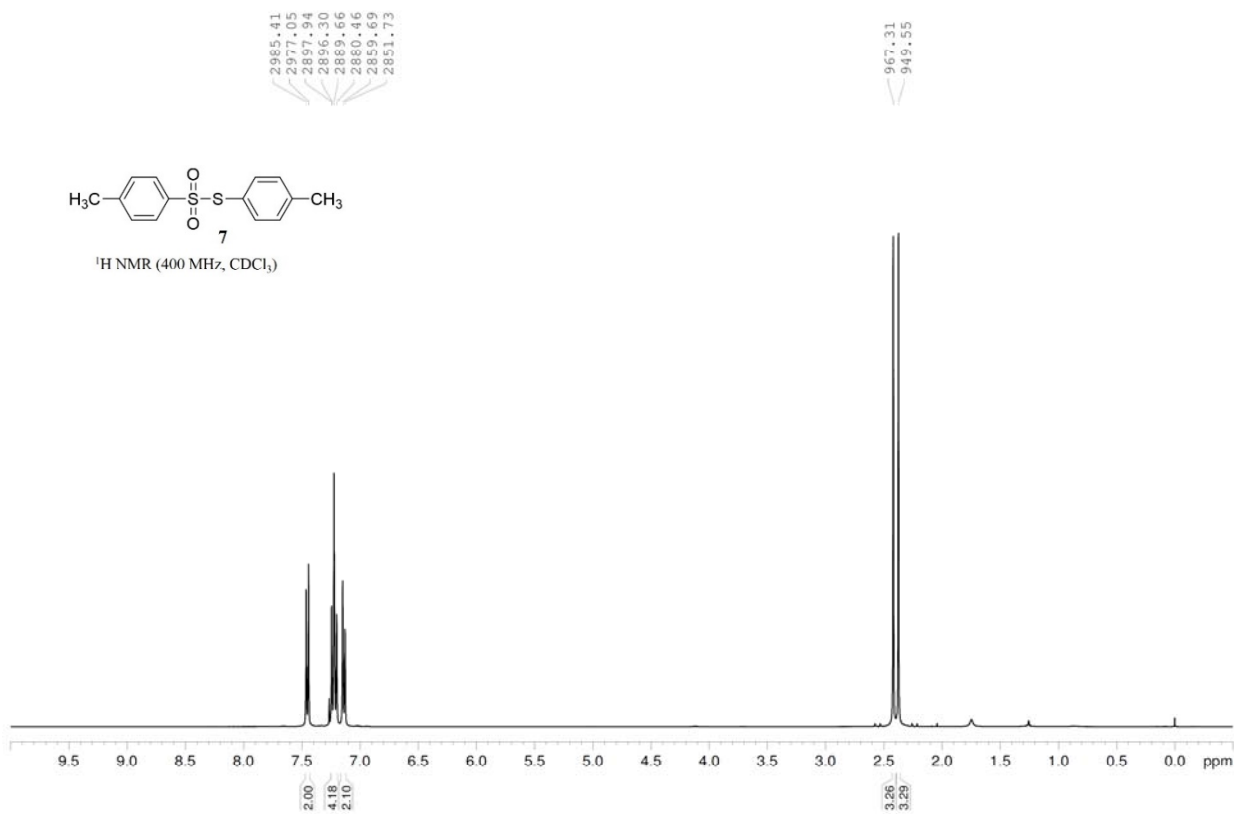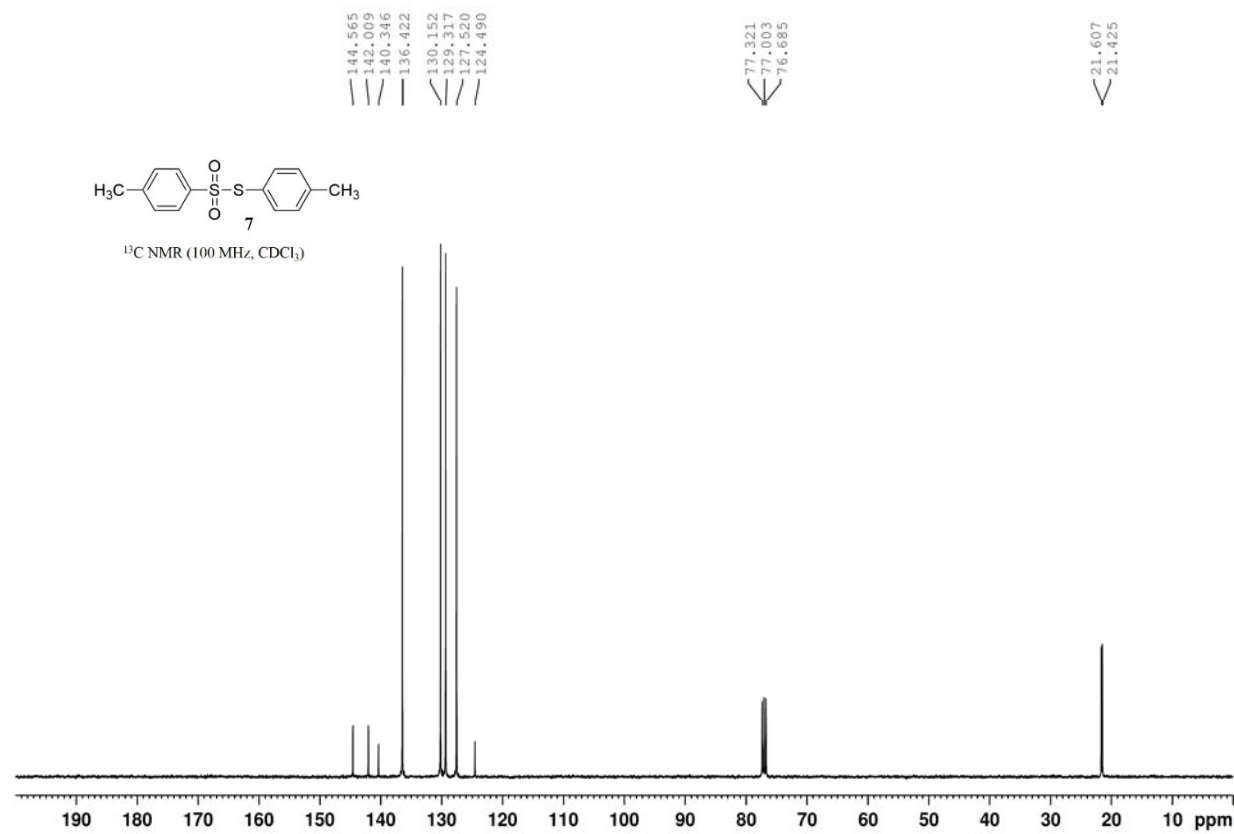

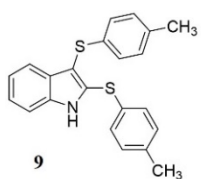

<sup>1</sup>H NMR (400 MHz, CDCl<sub>3</sub>)

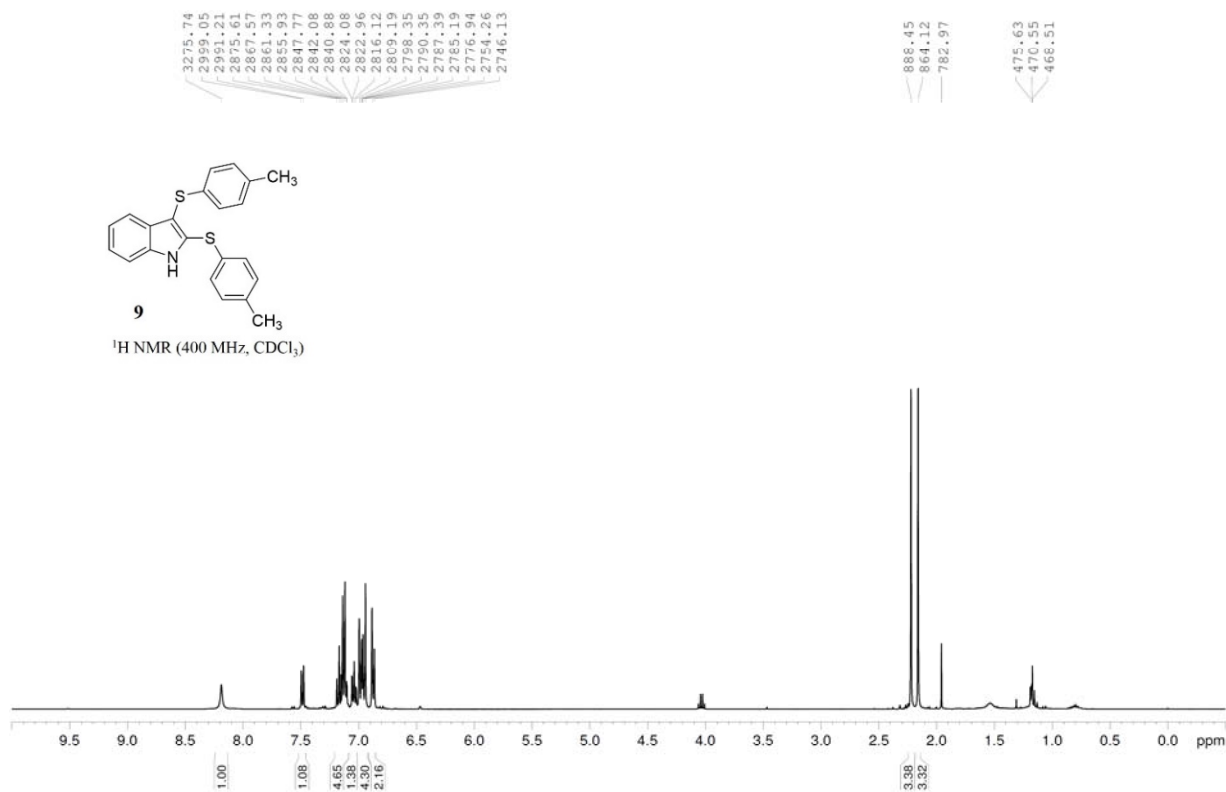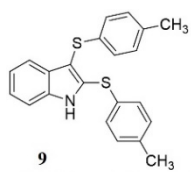

<sup>13</sup>C NMR (100 MHz, CDCl<sub>3</sub>)

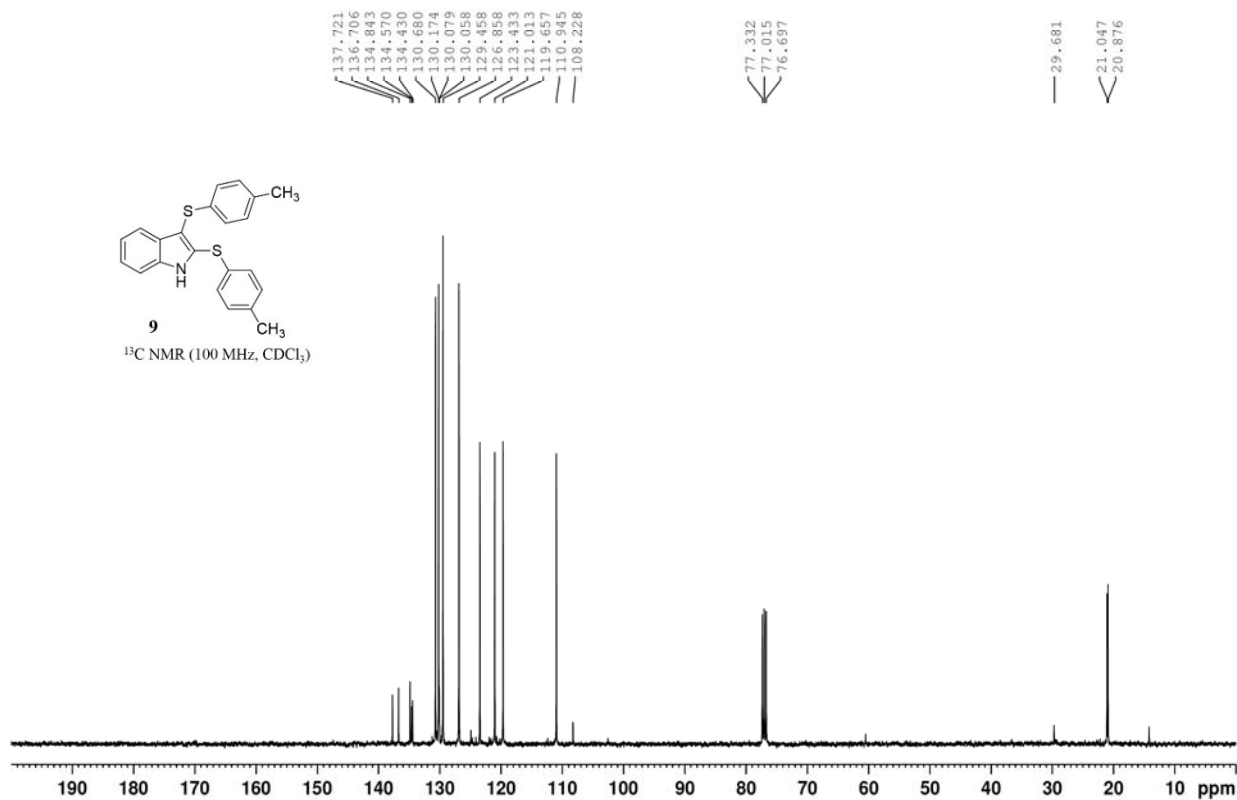

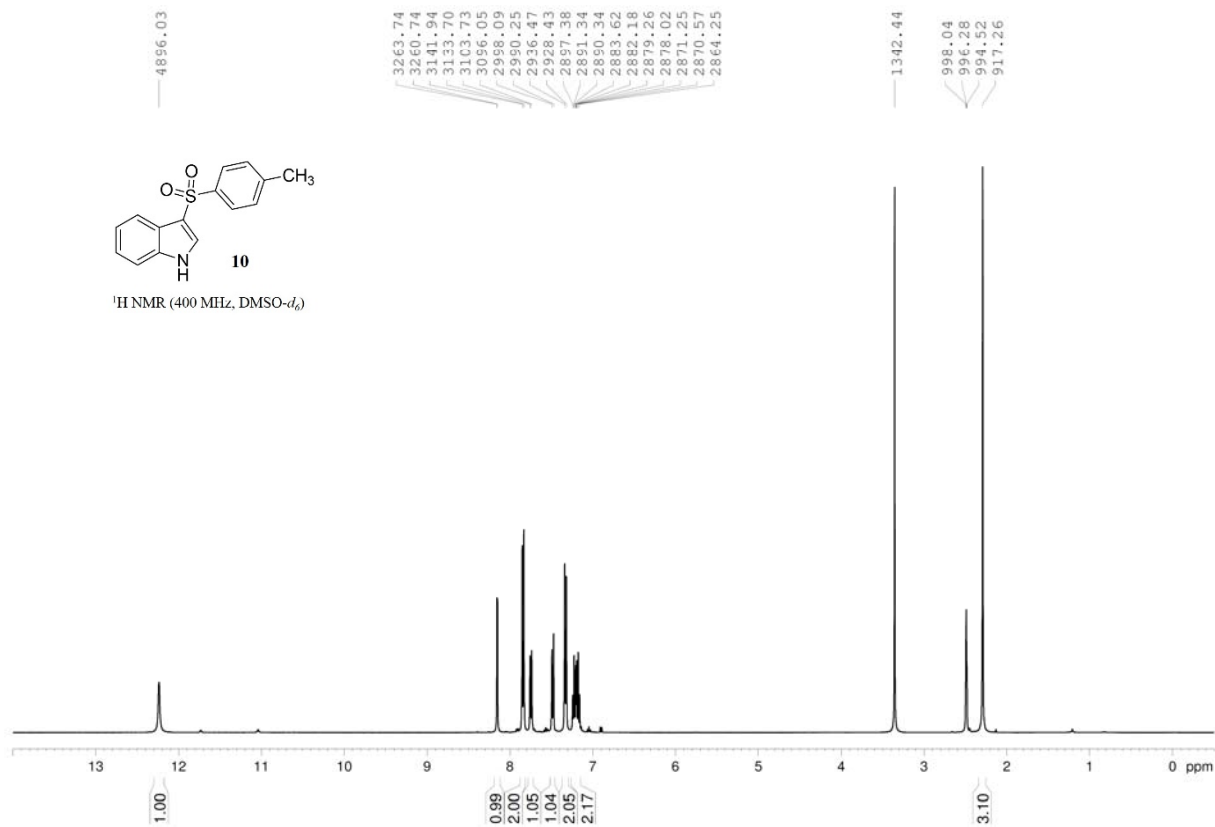

Supplement: c4ra02607a1.pdf [file c4ra02607a1.pdf]
